# Supplementary material for: Oxidative cross-dehydrogenative coupling (CDC) via C(sp2)–H bond functionalization: tert-butyl peroxybenzoate (TBPB)-promoted regioselective direct C-3 acylation/benzoylation of 2H-indazoles with aldehydes/benzyl alcohols/styrenes
Source: Royal Society of Chemistry journal article supplement (doi:10.1039/d1ra02225c), 2021-01-01
Supplement: d1ra02225c1.pdf [file d1ra02225c1.pdf]

---

## Supporting Information

### **Oxidative Cross-Dehydrogenative Coupling (CDC) via C<sub>(sp<sup>2</sup>)</sub>-H bond Functionalization: *tert*-Butyl Peroxybenzoate-promoted Regioselective Direct C-3 Acylation/Benzoylation of 2*H*-Indazoles with Aldehydes/Benzyl Alcohols/Styrenes**

Richa Sharma, Lalit Yadav, Ravi Kant Yadav and Sandeep Chaudhary\*

<sup>a</sup>Laboratory of Organic and Medicinal Chemistry, Department of Chemistry, Malaviya National Institute of Technology, Jawaharlal Nehru Marg, Jaipur-302017, India.

Fax: 911412529029; Tel: 911412713319; E-mail: [schaudhary.chy@mnit.ac.in](mailto:schaudhary.chy@mnit.ac.in)

### Content

| S.No. | Spectral Data                                                                                                                            | Pages    |
|-------|------------------------------------------------------------------------------------------------------------------------------------------|----------|
| 1.    | <sup>1</sup> H and <sup>13</sup> C spectral data of C-3 acylated/benzoylated-2-aryl-2 <i>H</i> -Indazoles <b>3a-q/4a-l, 7, 11, 13-14</b> | S2 - S34 |

## 1. $^1\text{H}$ NMR and $^{13}\text{C}$ NMR Spectra of the Products

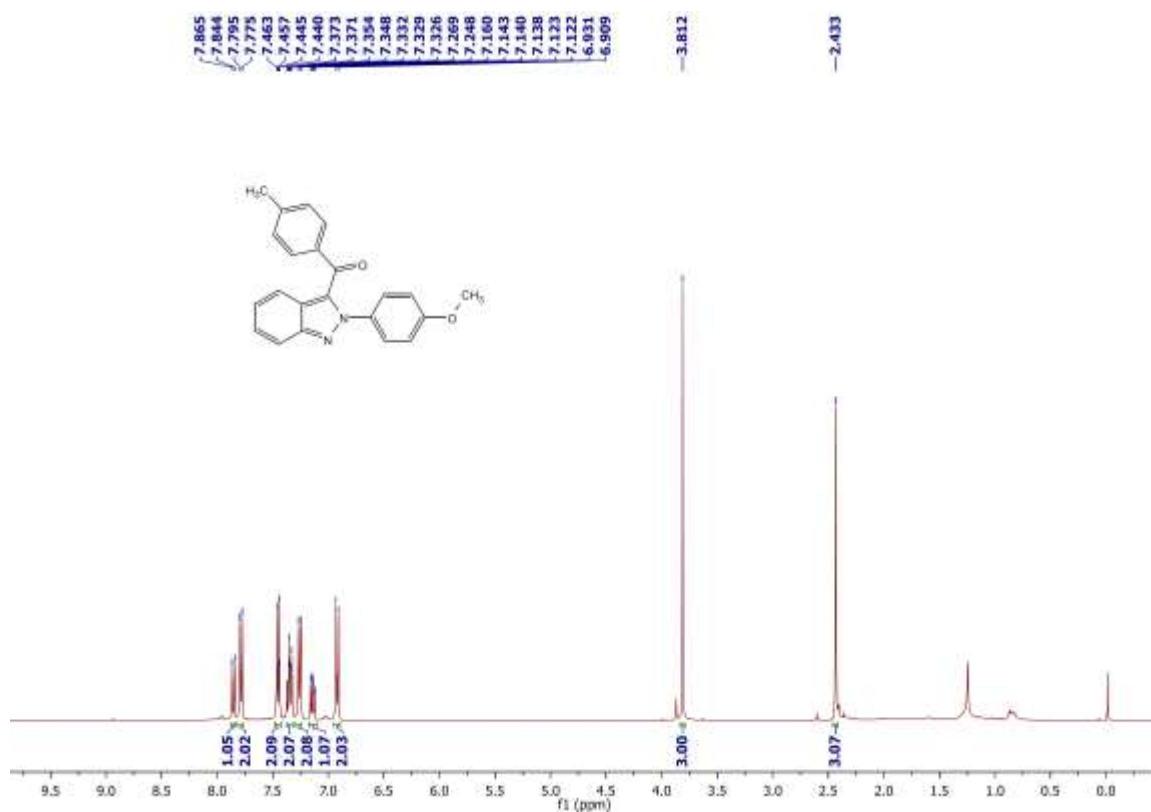

$^1\text{H}$  NMR (400 MHz, Chloroform-*d*) Spectra of **3a**

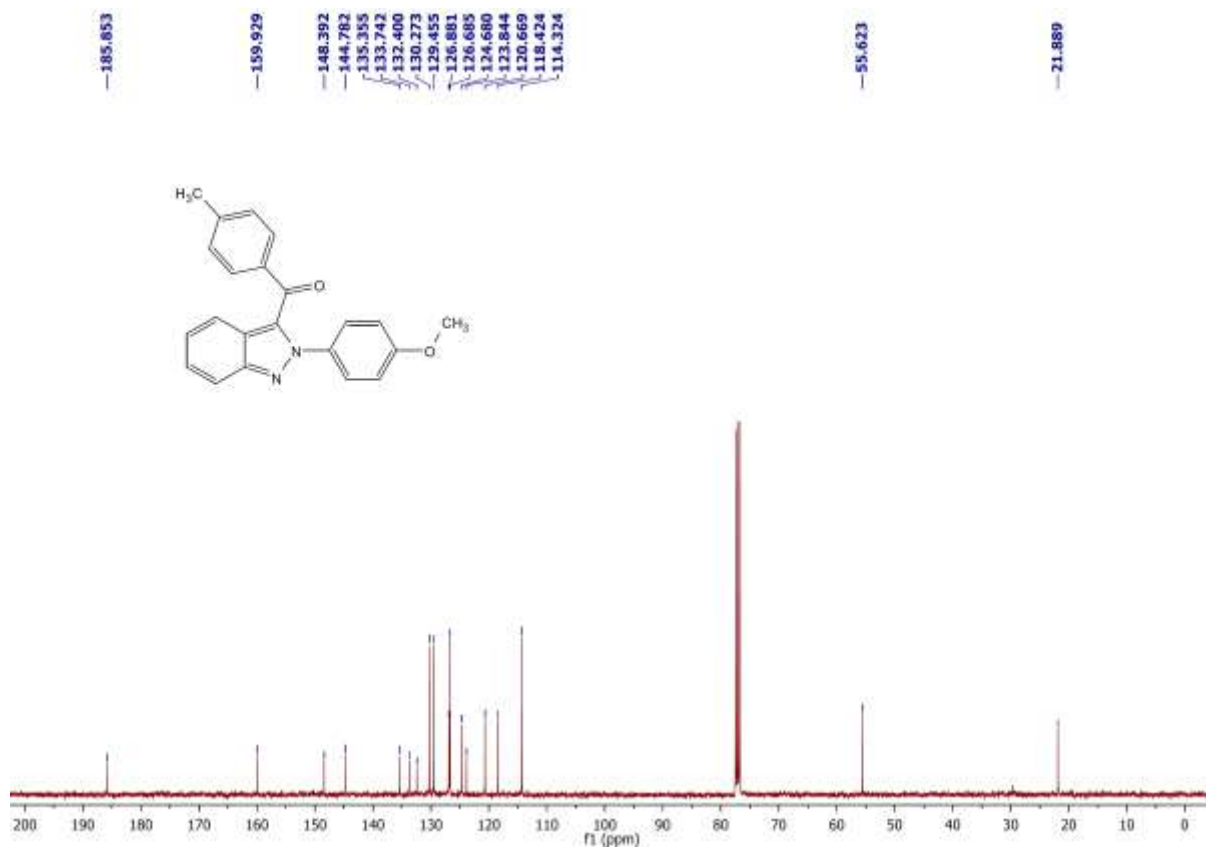

$^{13}\text{C}$  NMR (100 MHz, Chloroform-*d*) Spectra of **3a**

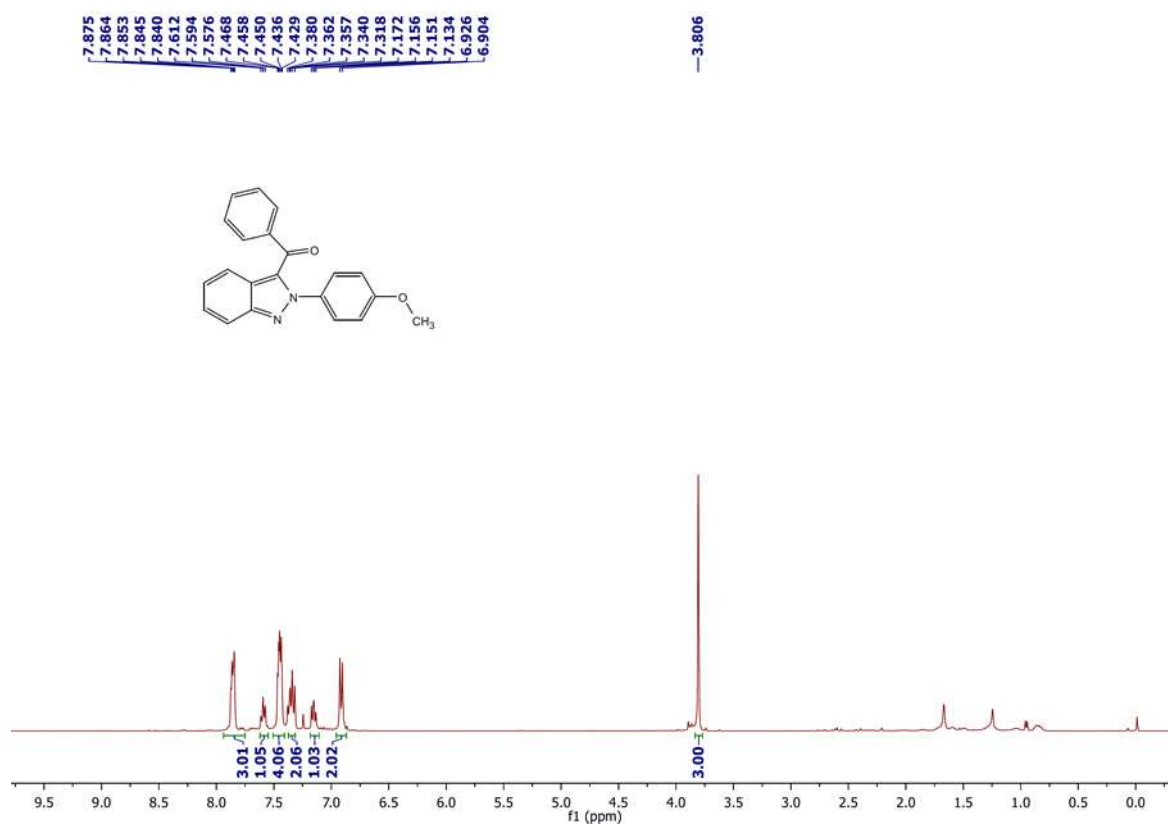

<sup>1</sup>H NMR (400 MHz, Chloroform-*d*) Spectra of **3b**

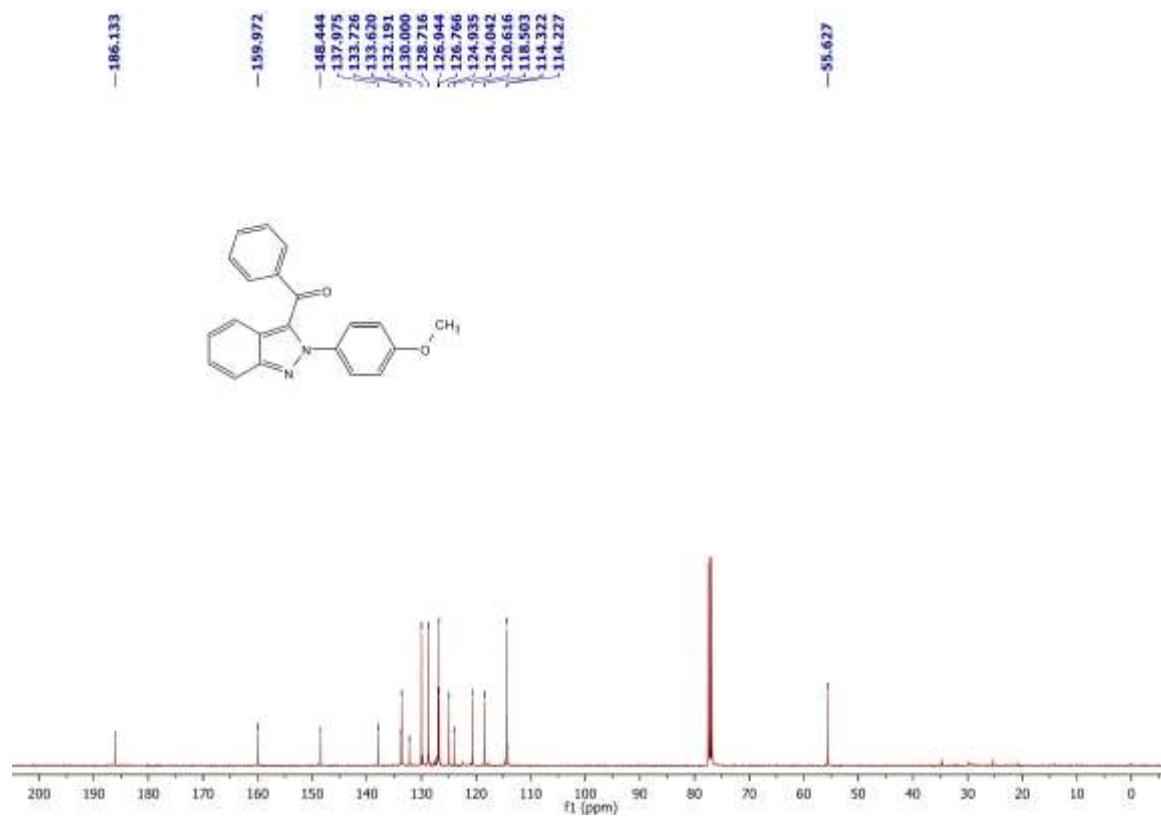

<sup>13</sup>C NMR (100 MHz, Chloroform-*d*) Spectra of **3b**

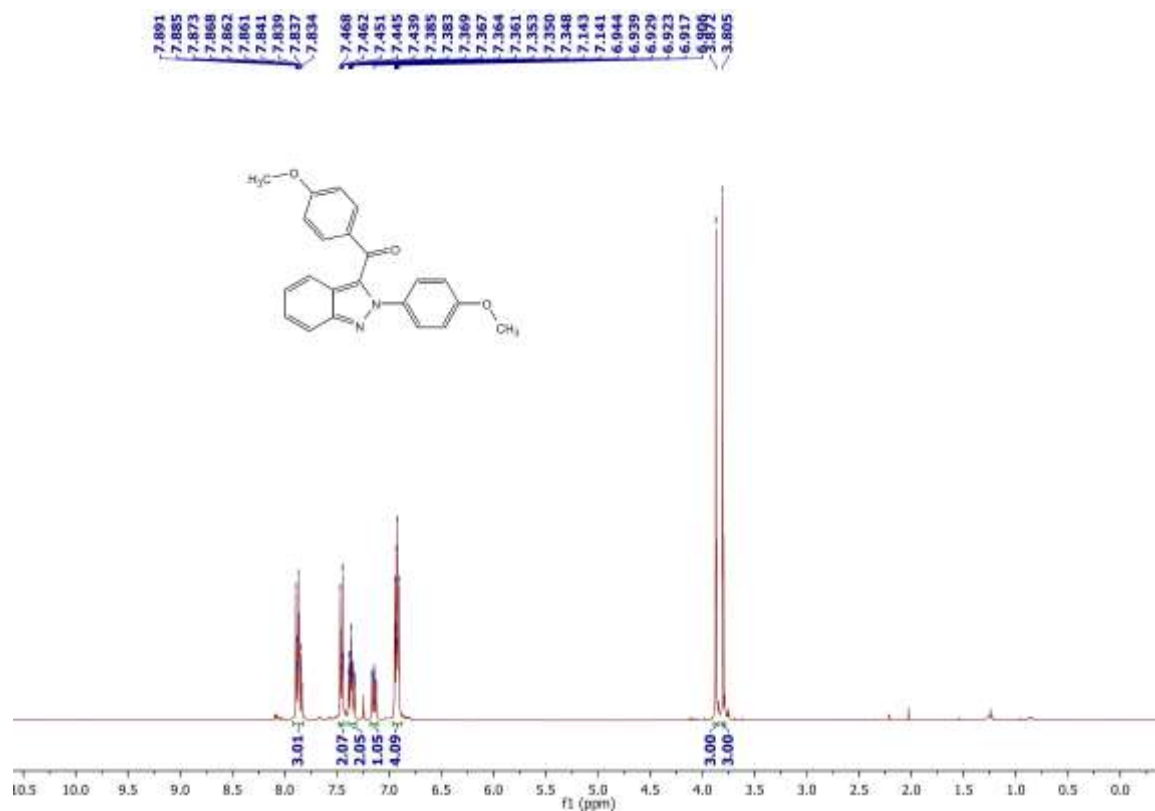

<sup>1</sup>H NMR (400 MHz, Chloroform-*d*) Spectra of **3c**

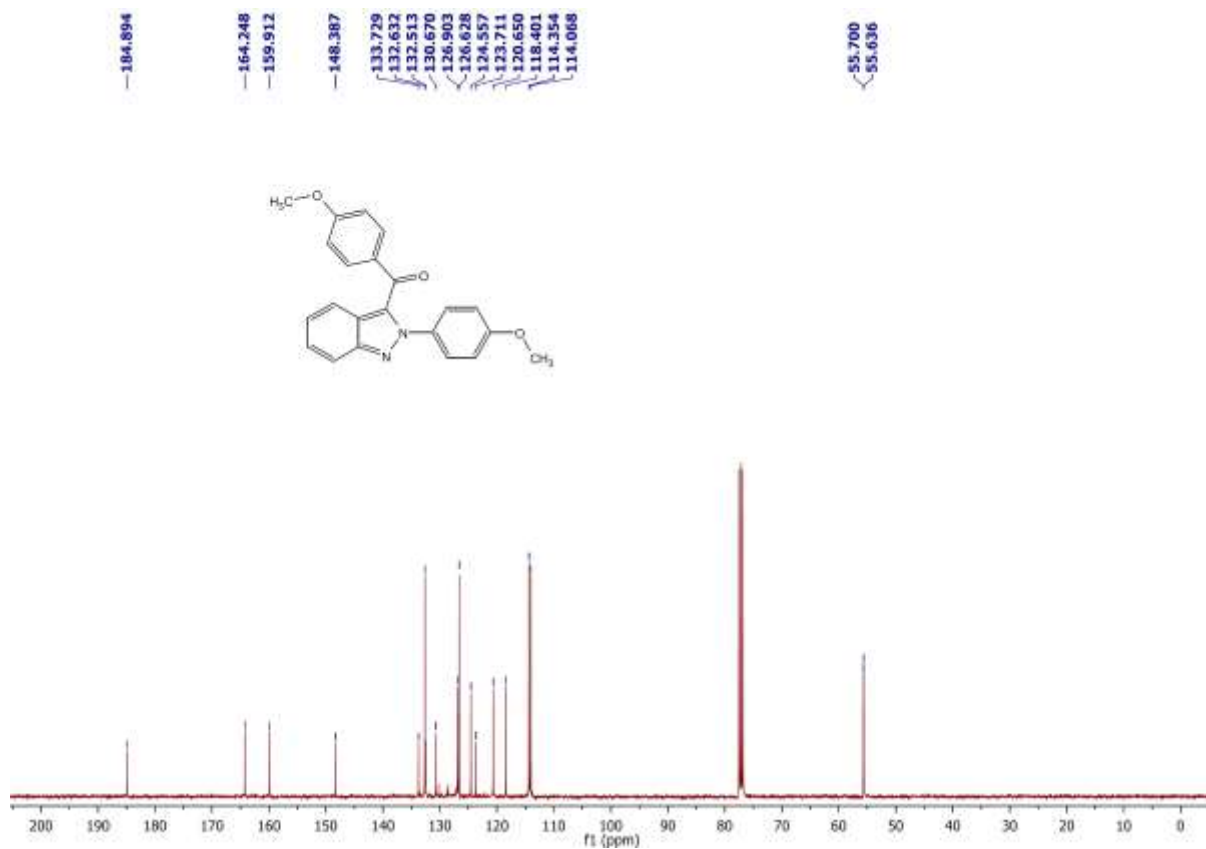

<sup>13</sup>C NMR (100 MHz, Chloroform-*d*) Spectra of **3c**

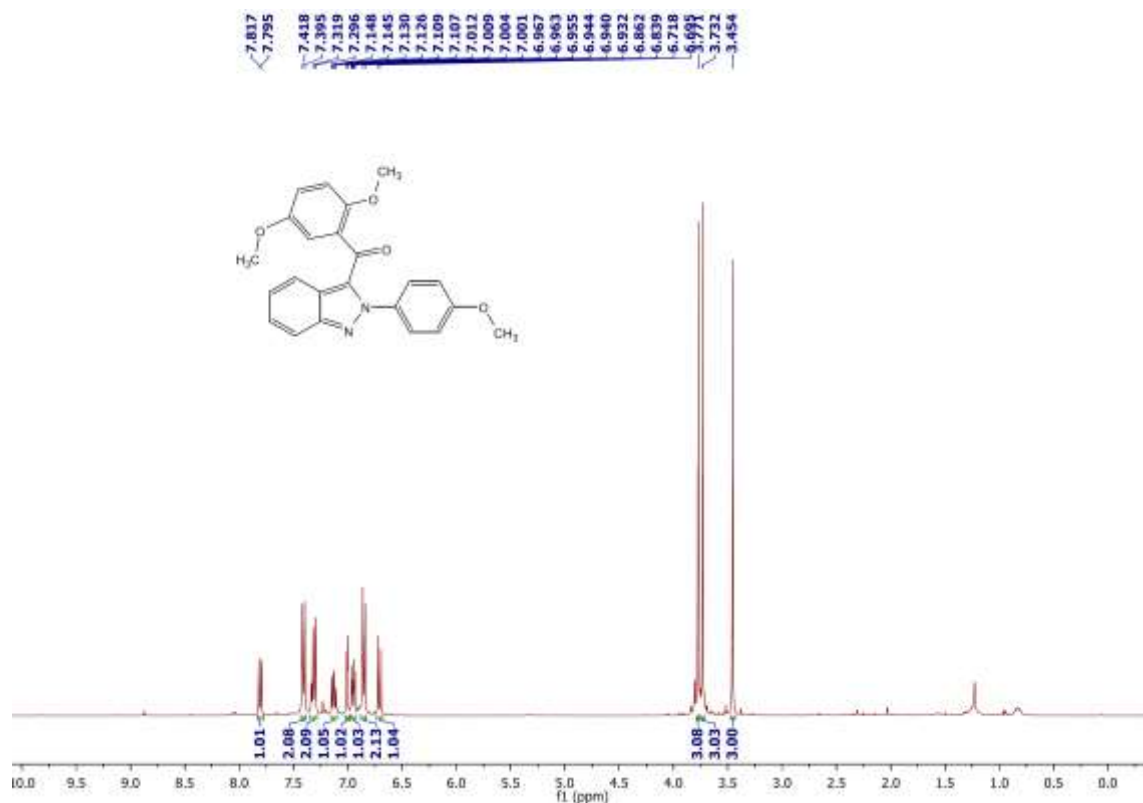

$^1\text{H NMR}$  (400 MHz, Chloroform-*d*) Spectra of **3d**

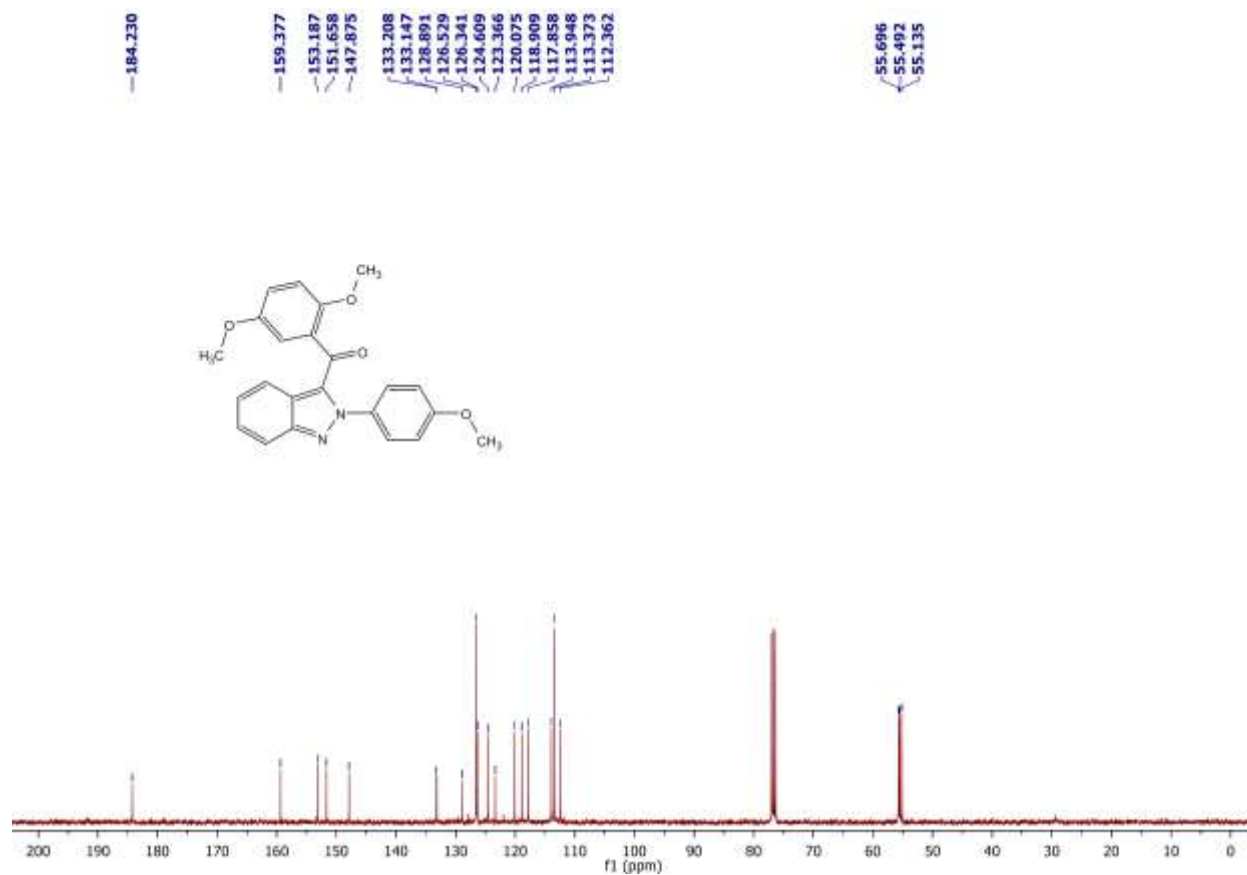

$^{13}\text{C NMR}$  (100 MHz, Chloroform-*d*) Spectra of **3d**

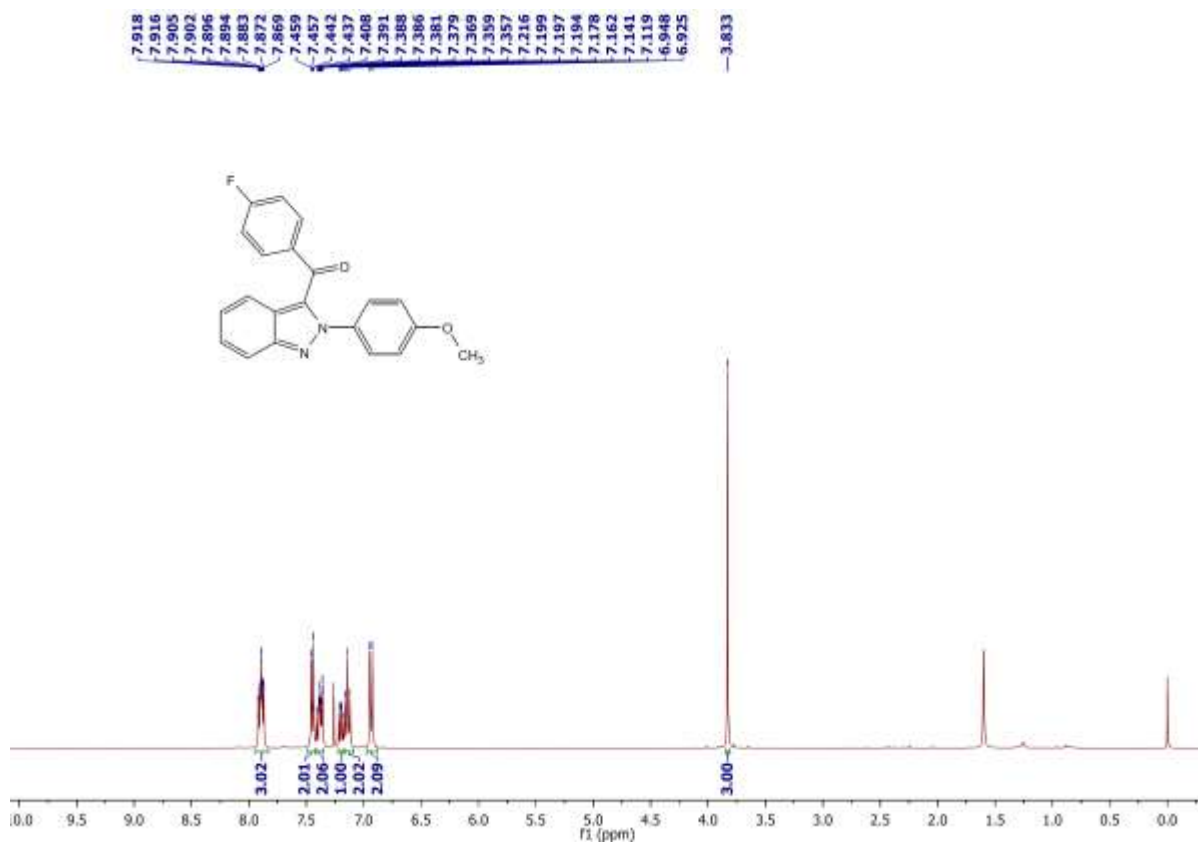

$^1\text{H NMR}$  (400 MHz, Chloroform-*d*) Spectra of **3e**

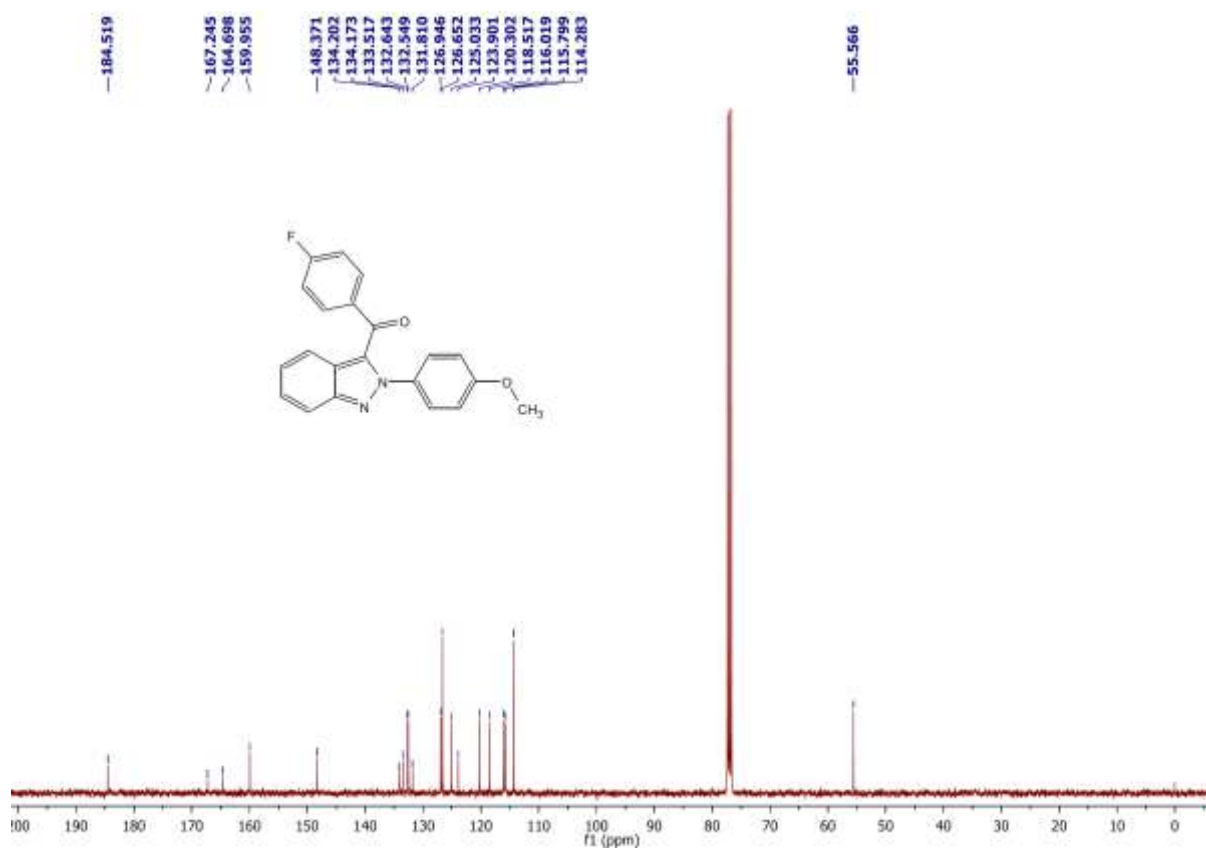

$^{13}\text{C NMR}$  (100 MHz, Chloroform-*d*) Spectra of **3e**

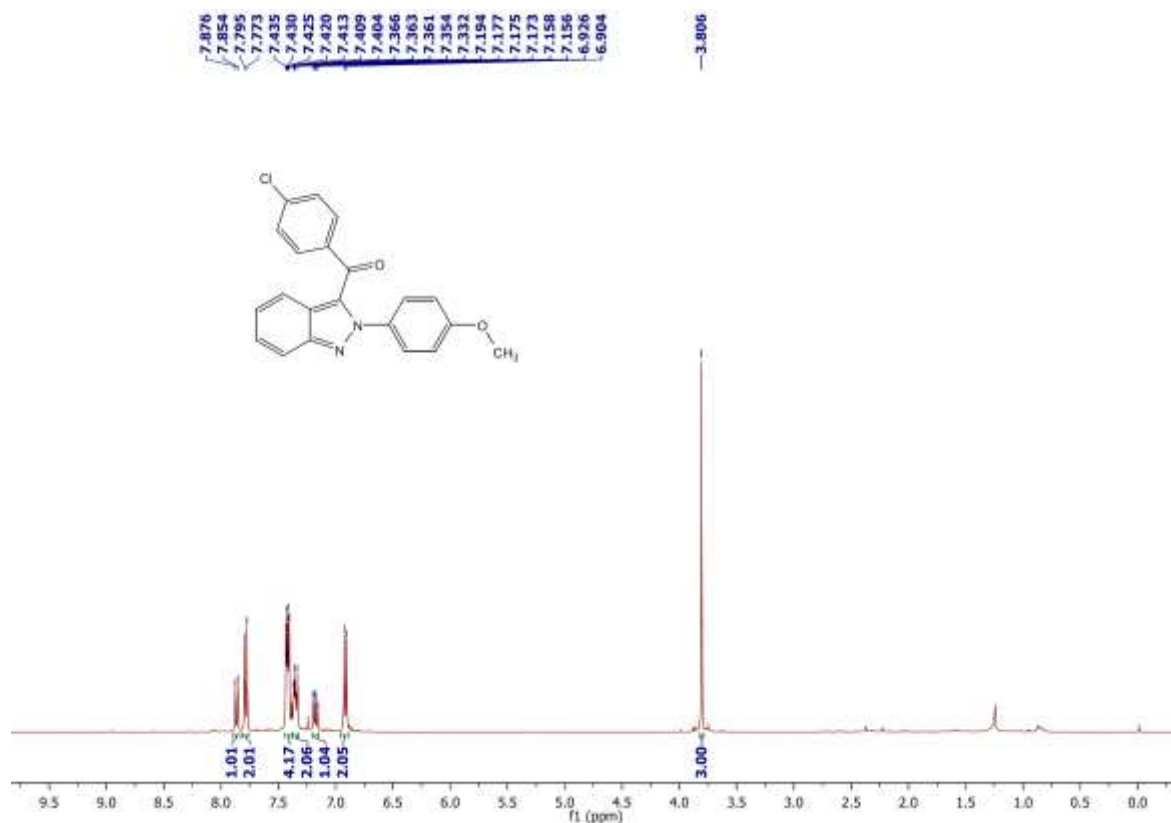

<sup>1</sup>H NMR (400 MHz, Chloroform-*d*) Spectra of **3f**

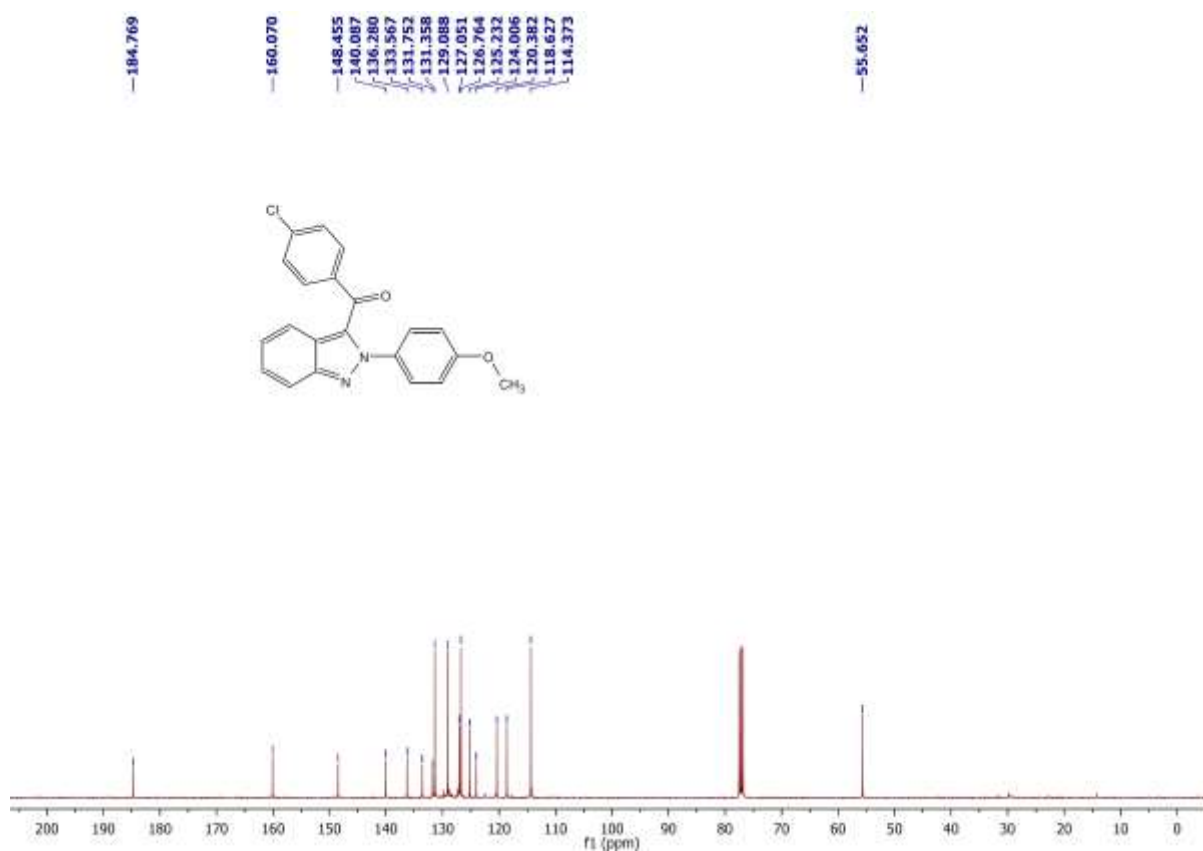

<sup>13</sup>C NMR (100 MHz, Chloroform-*d*) Spectra of **3f**

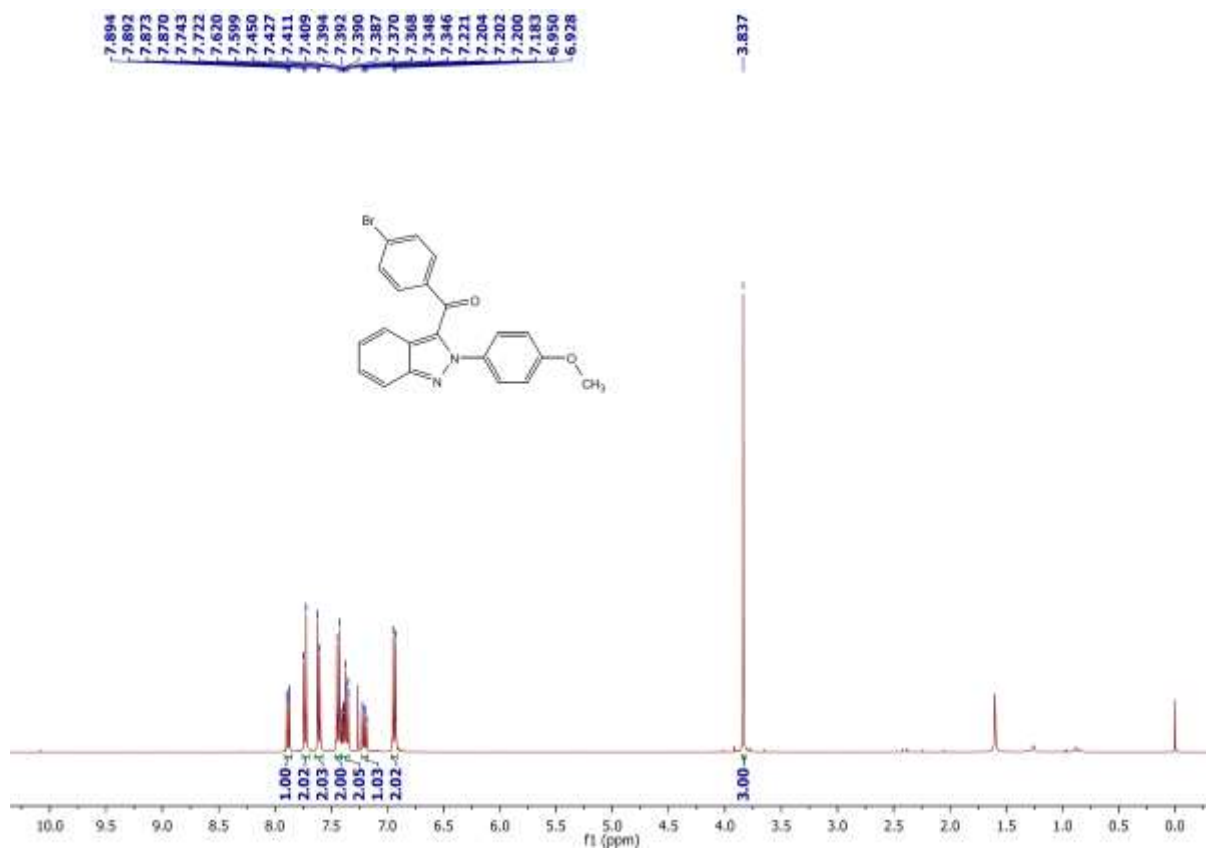

<sup>1</sup>H NMR (400 MHz, Chloroform-*d*) Spectra of **3g**

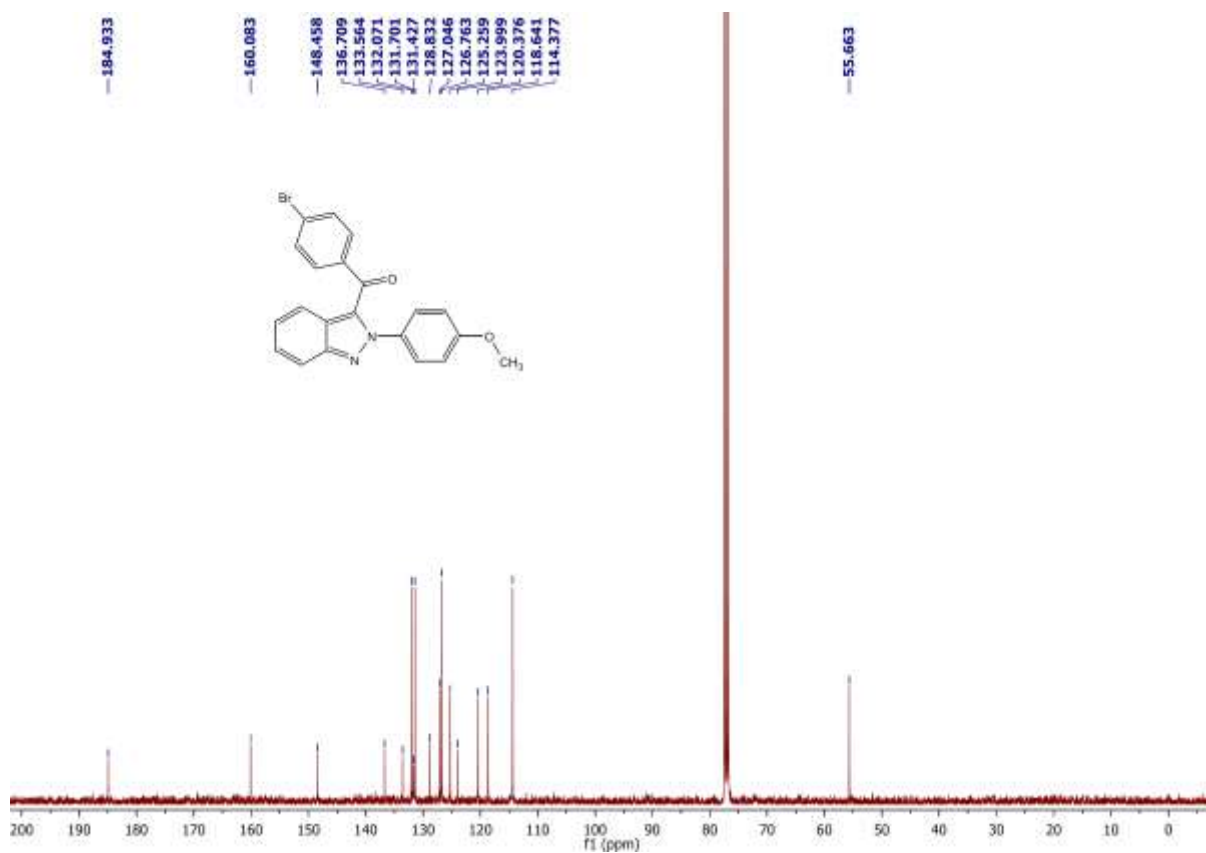

<sup>13</sup>C NMR (100 MHz, Chloroform-*d*) Spectra of **3g**



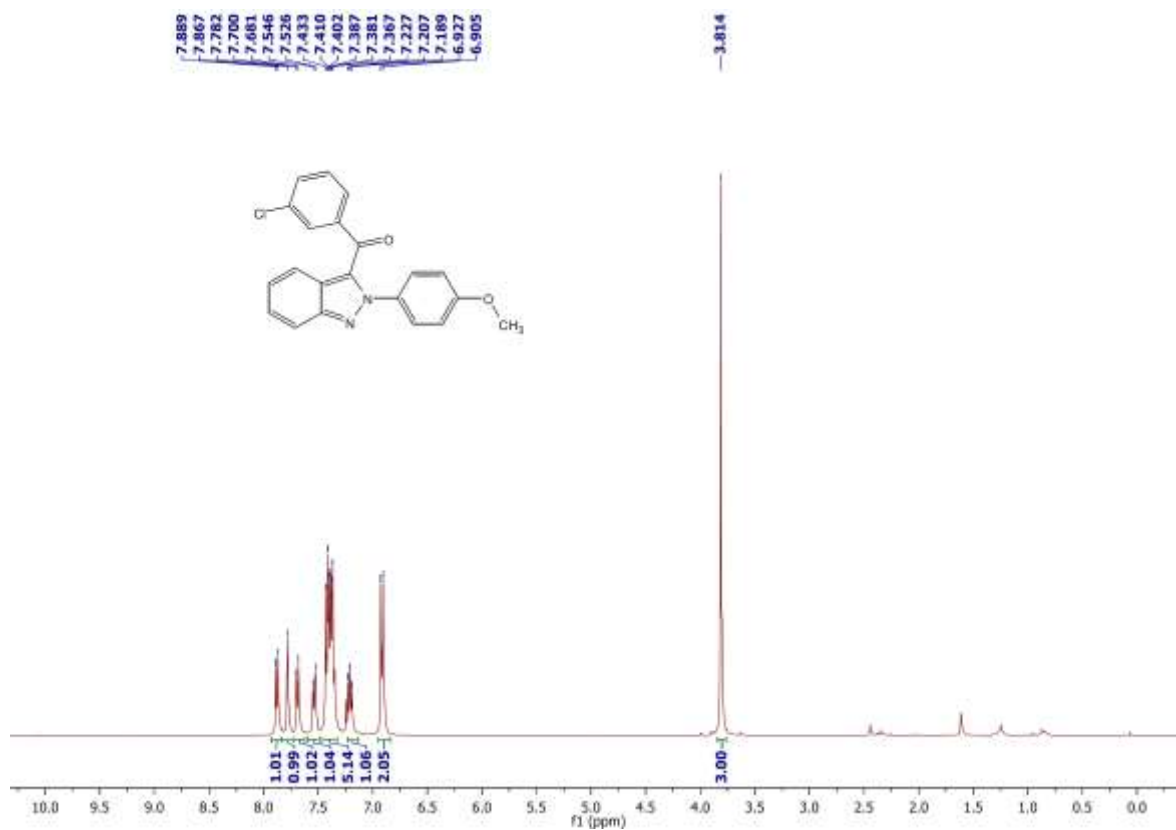

<sup>1</sup>H NMR (400 MHz, Chloroform-*d*) Spectra of **3h**

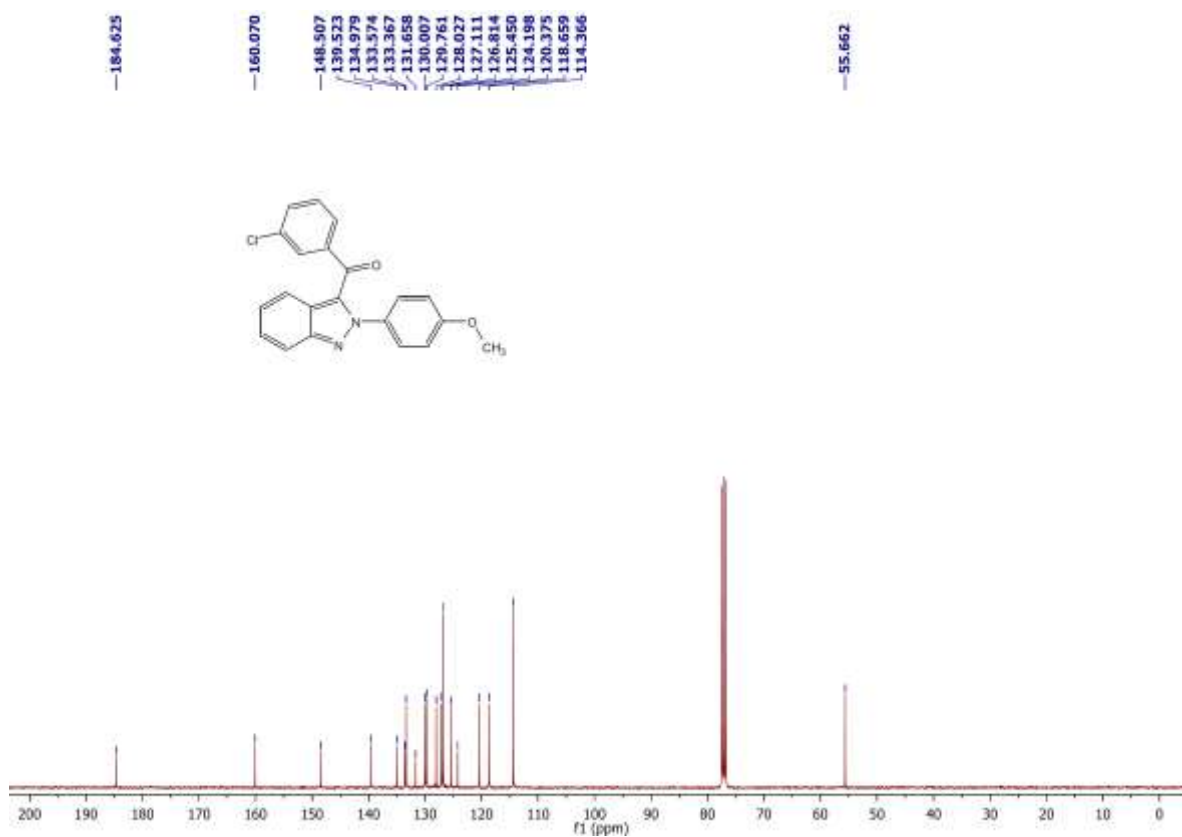

<sup>13</sup>C NMR (100 MHz, Chloroform-*d*) Spectra of **3h**

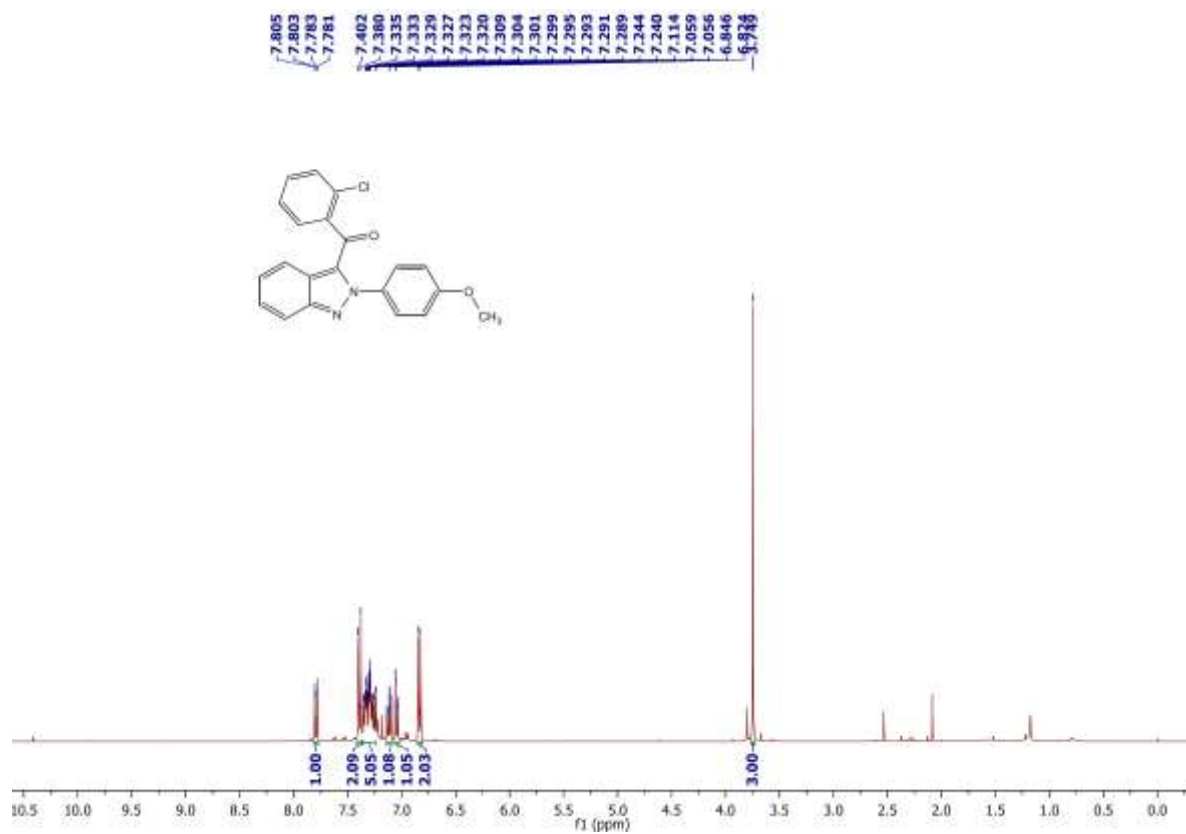

<sup>1</sup>H NMR (400 MHz, Chloroform-*d*) Spectra of **3i**

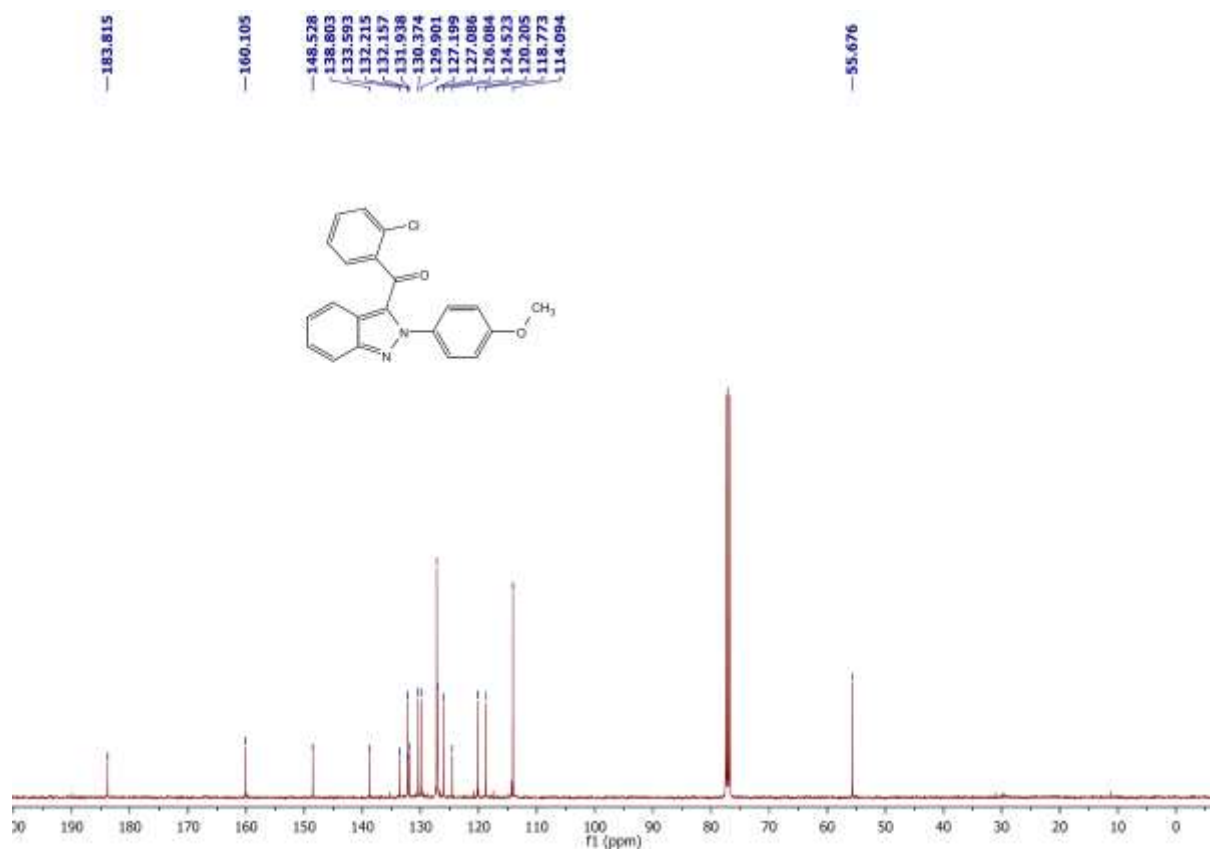

<sup>13</sup>C NMR (100 MHz, Chloroform-*d*) Spectra of **3i**

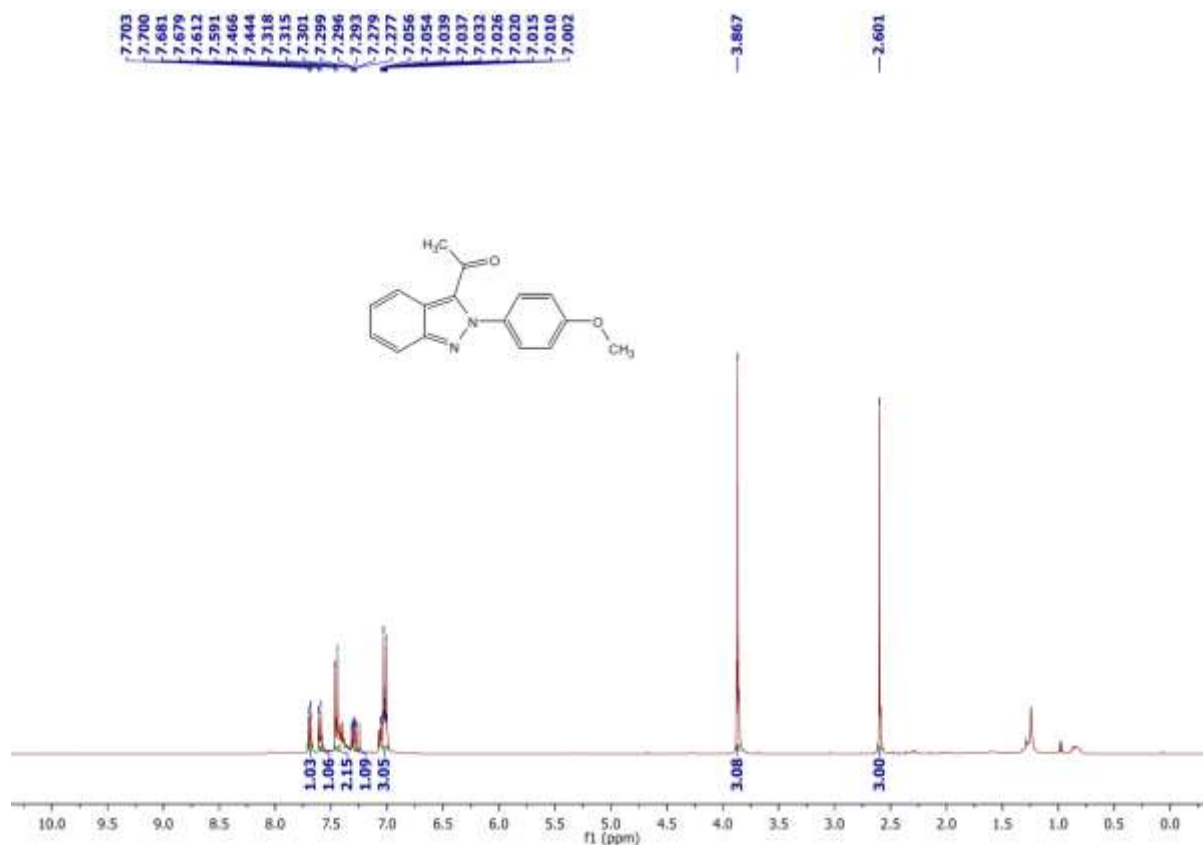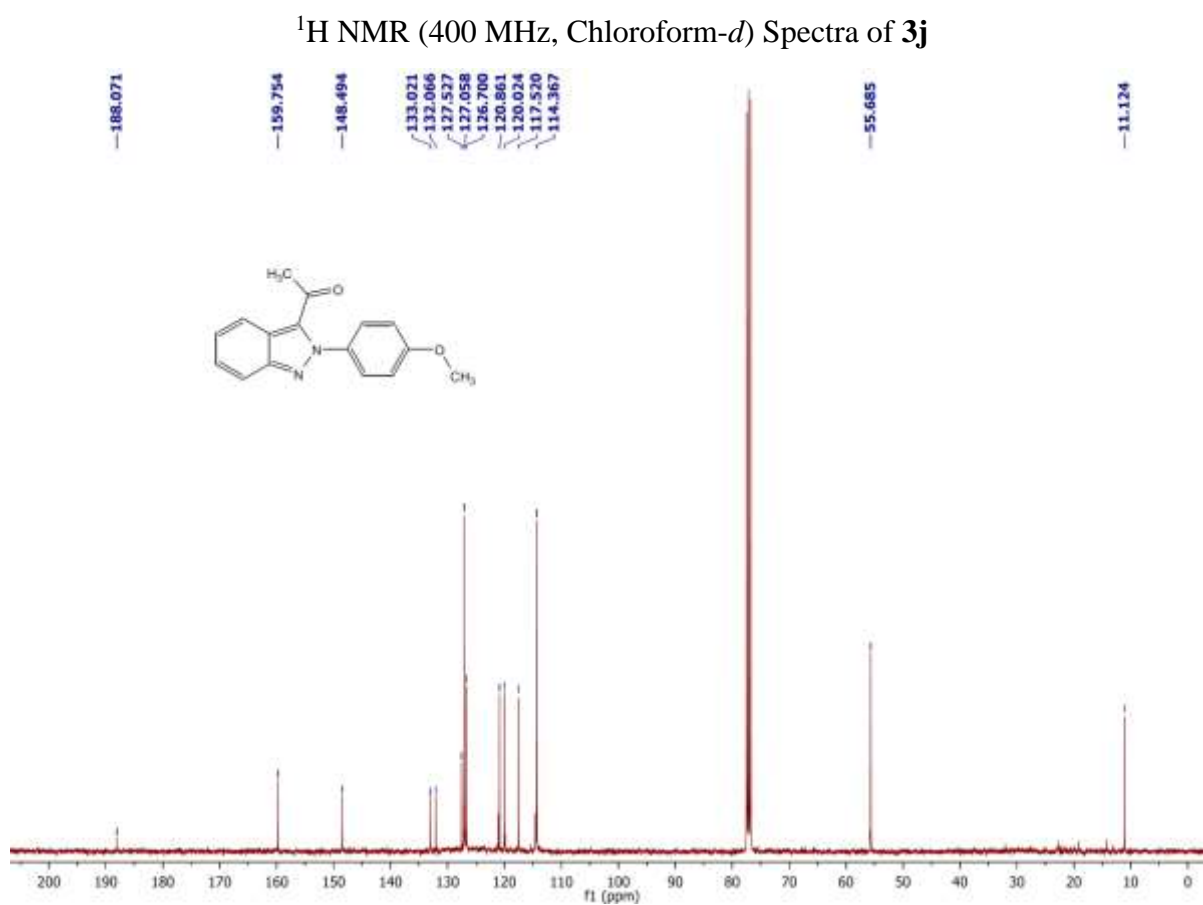

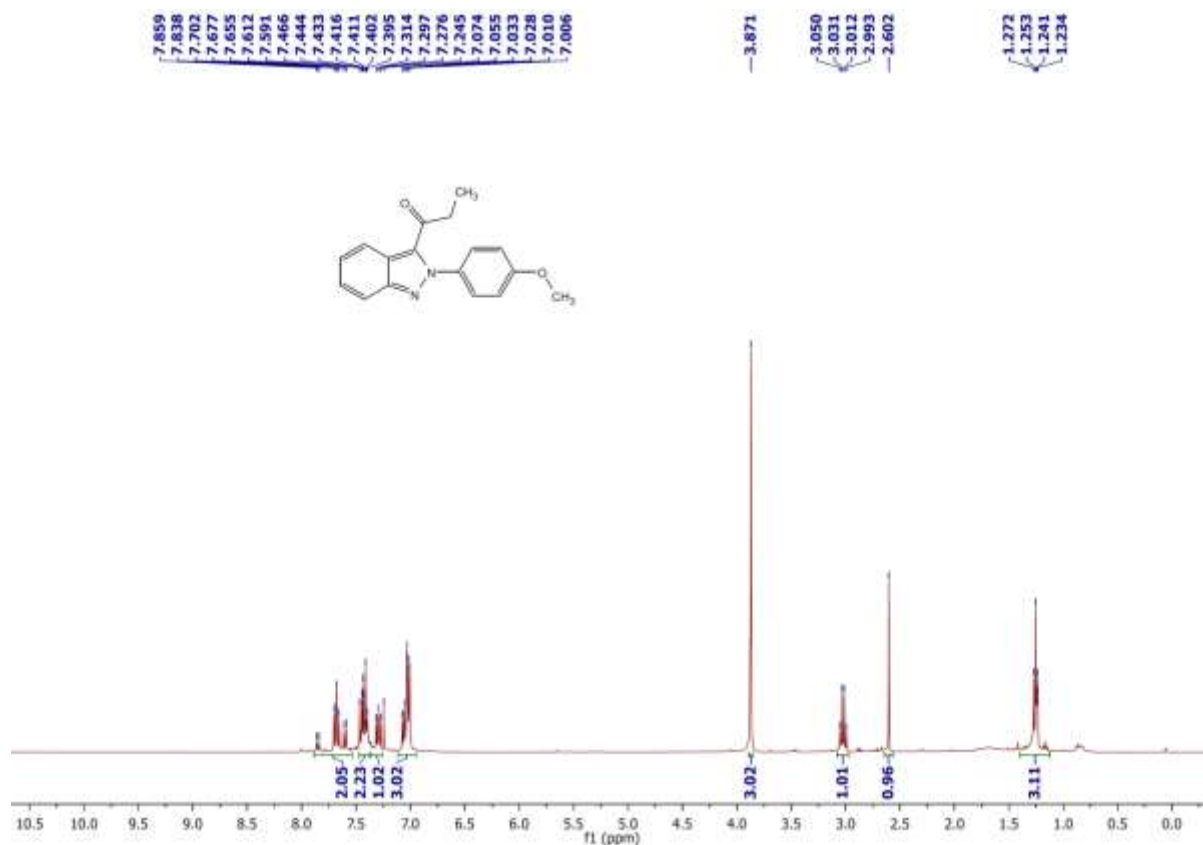

$^1\text{H}$  NMR (400 MHz, Chloroform-*d*) Spectra of **3k**

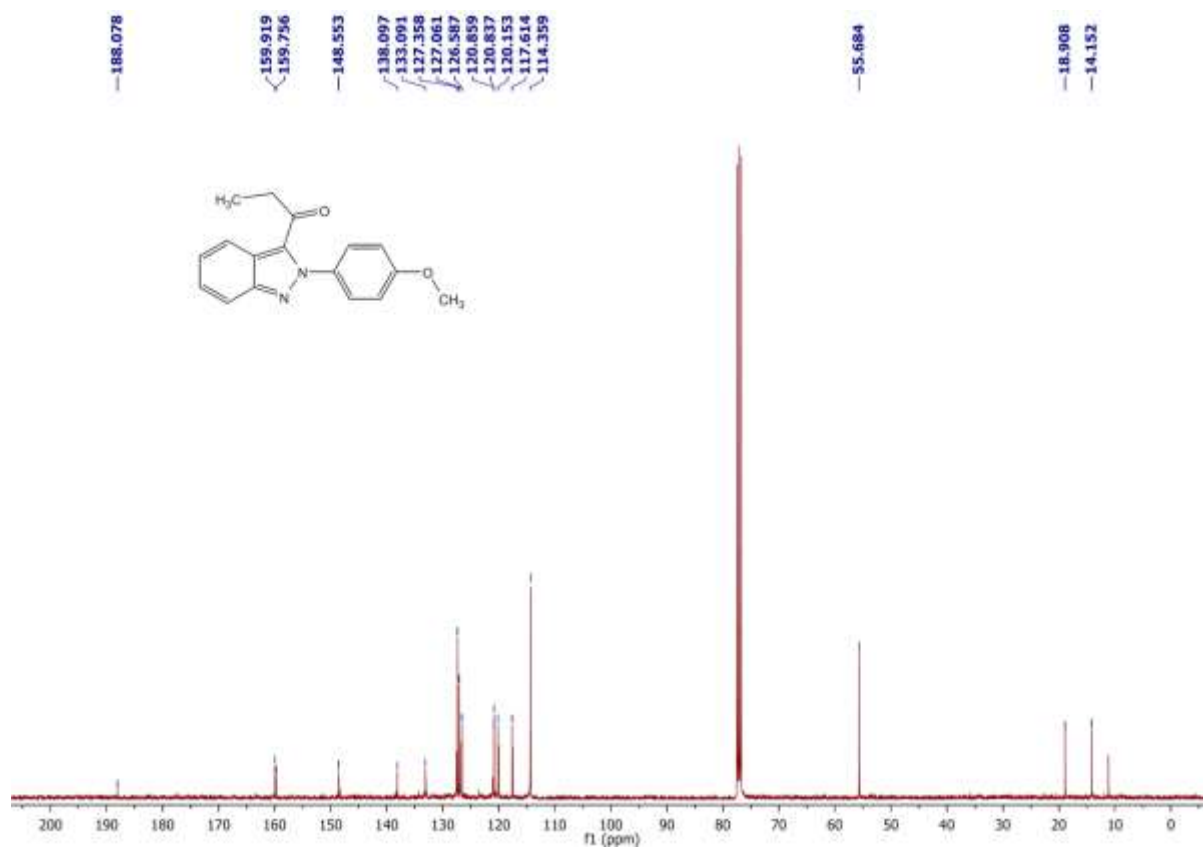

$^{13}\text{C}$  NMR (100 MHz, Chloroform-*d*) Spectra of **3k**

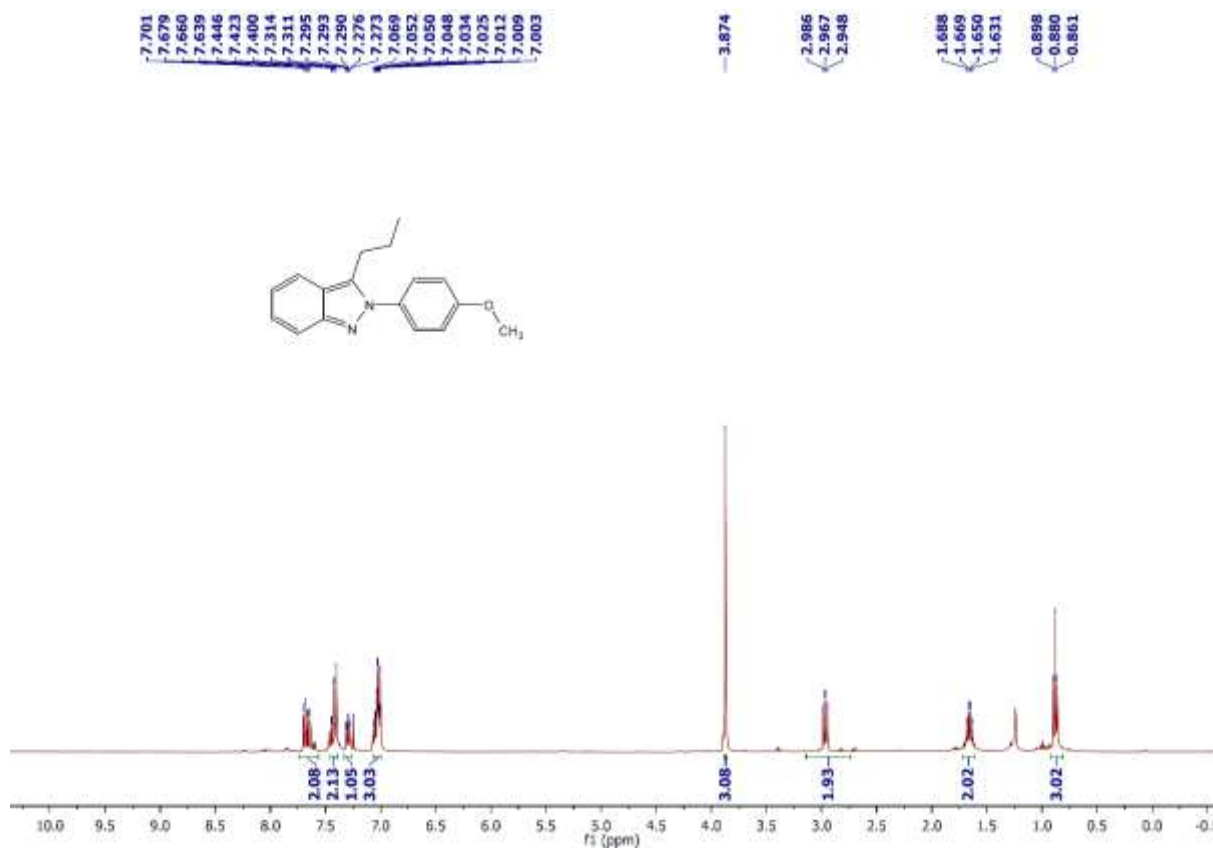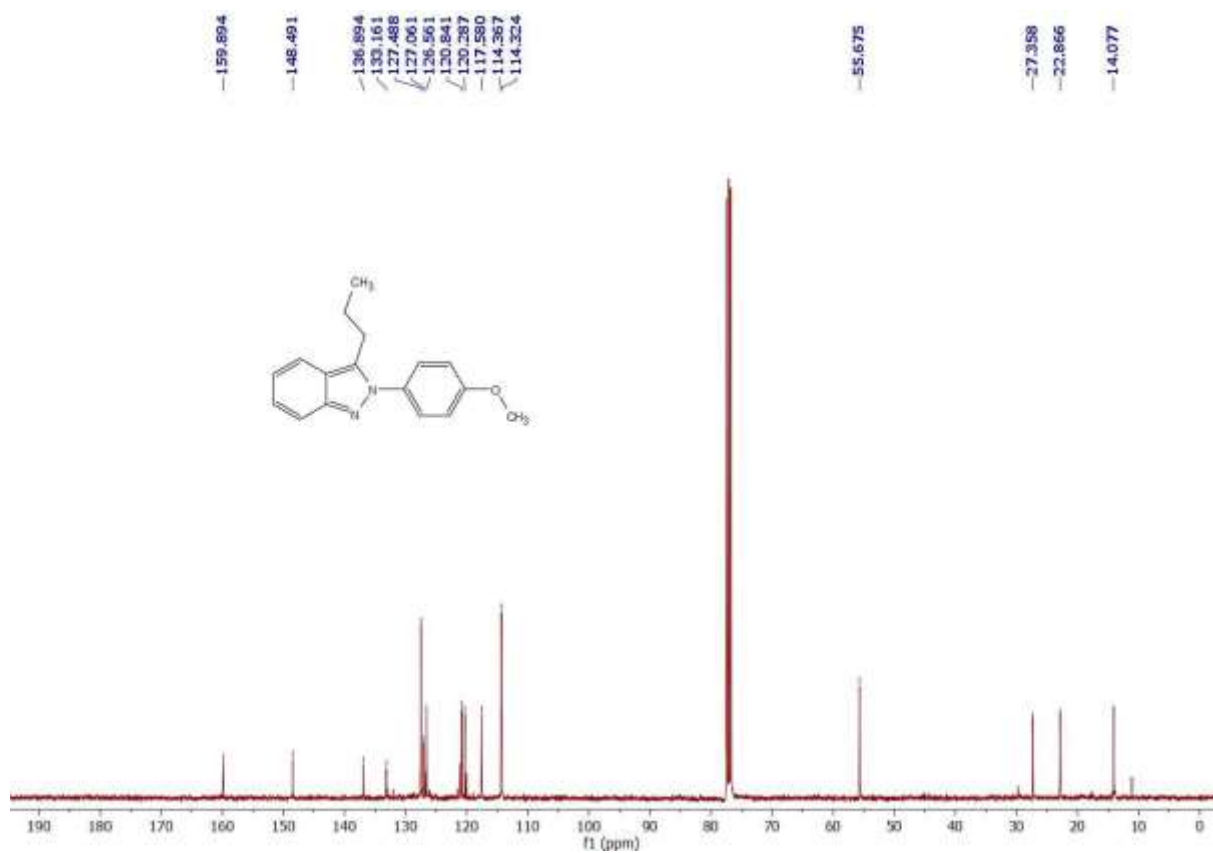

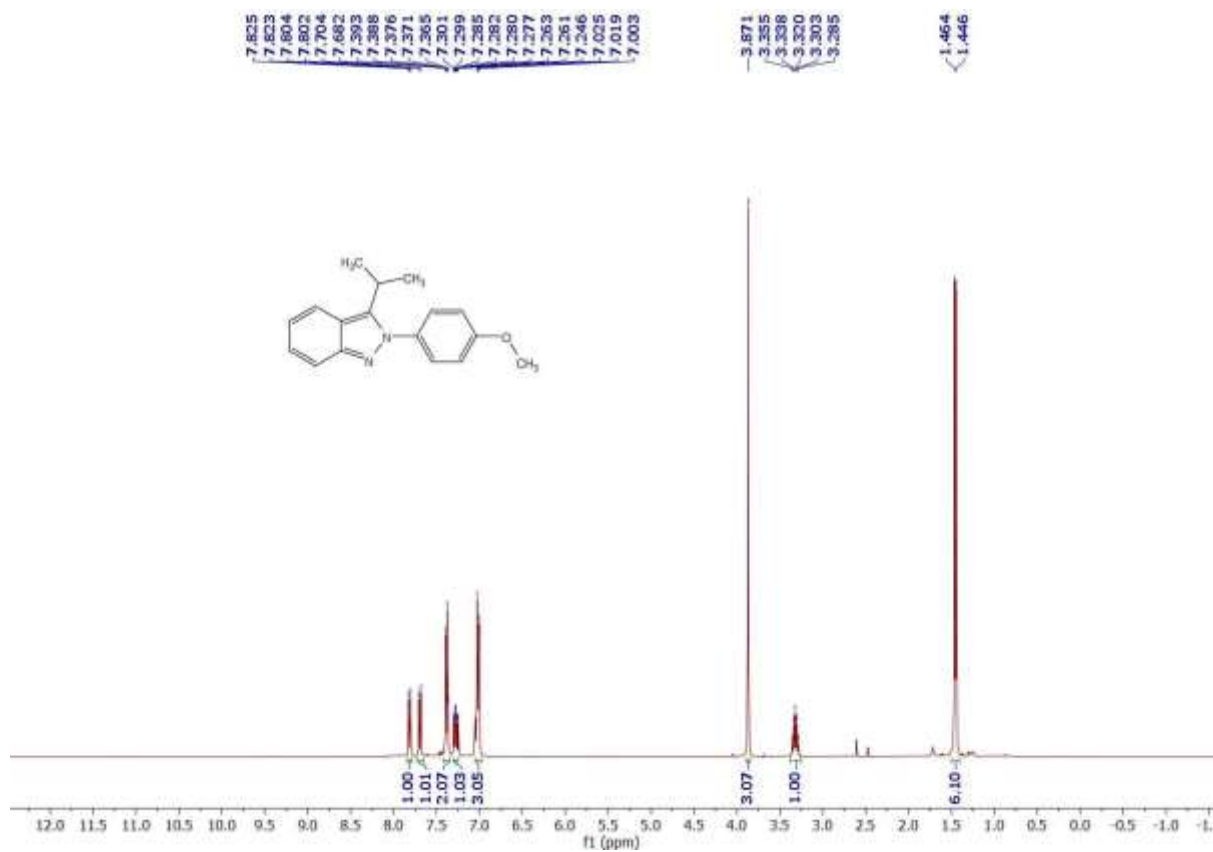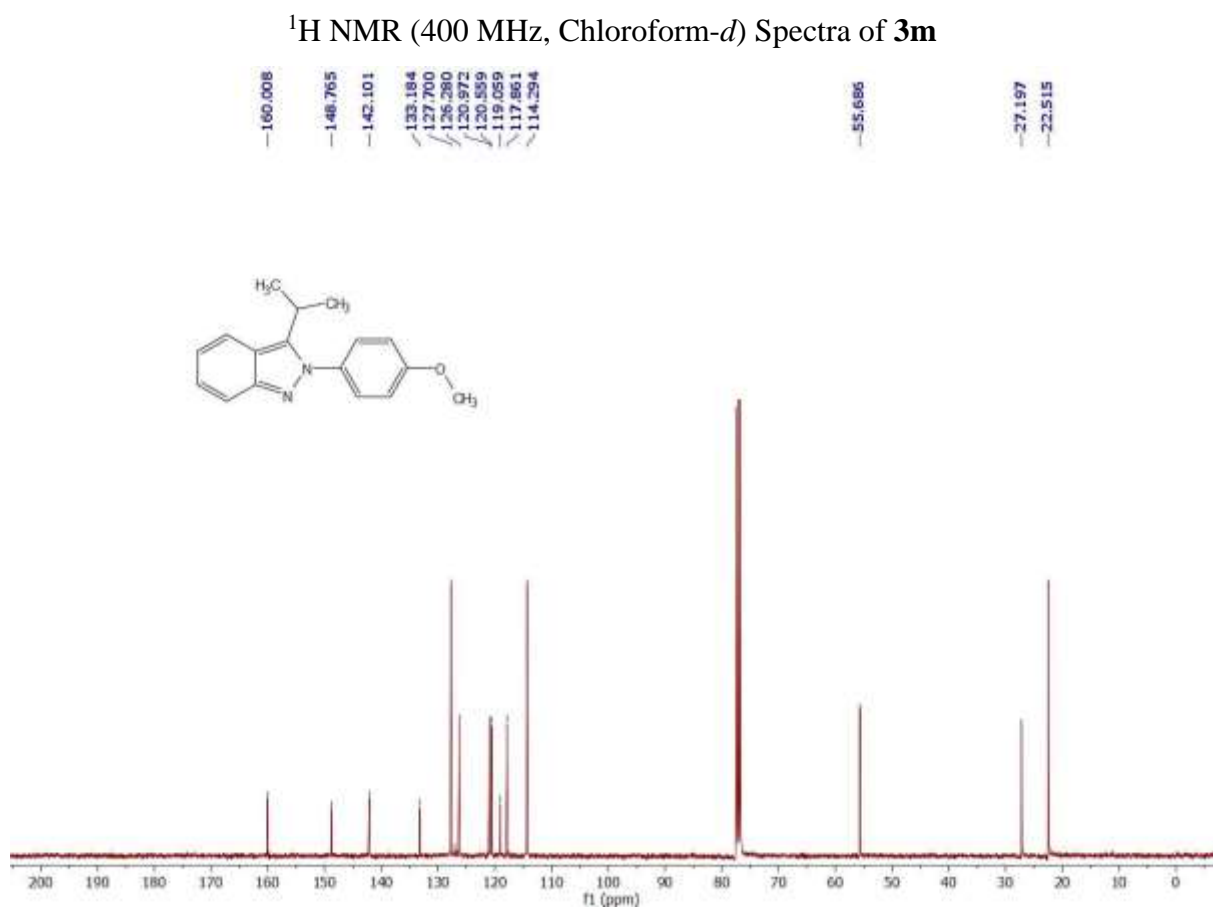

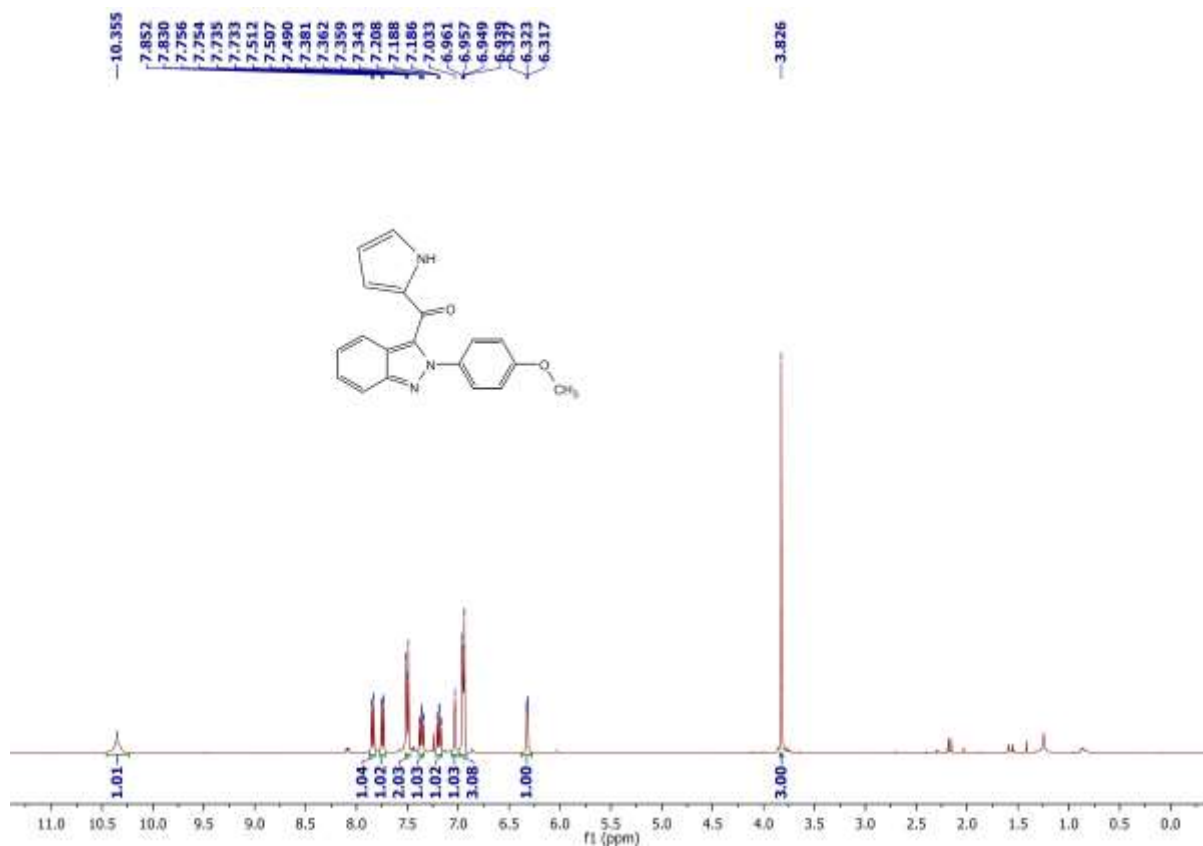

<sup>1</sup>H NMR (400 MHz, Chloroform-*d*) Spectra of **3n**

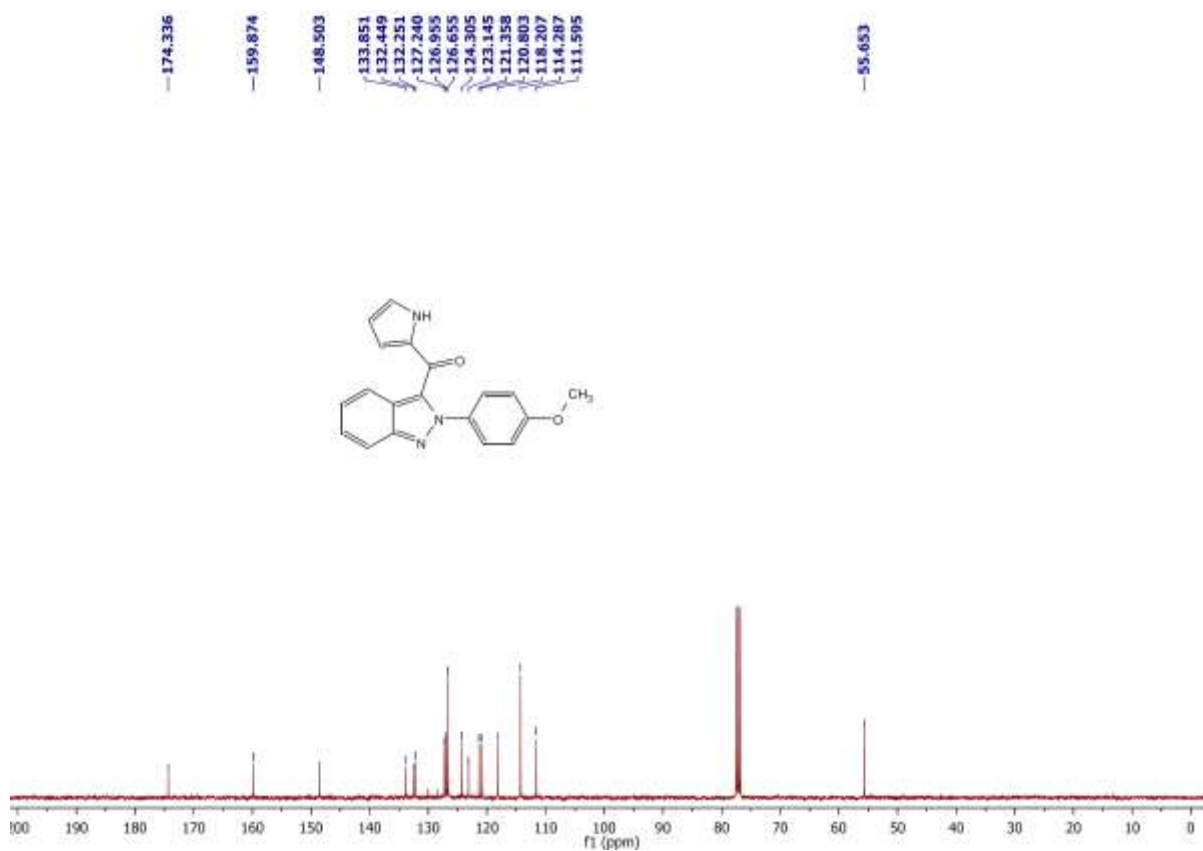

<sup>13</sup>C NMR (100 MHz, Chloroform-*d*) Spectra of **3n**

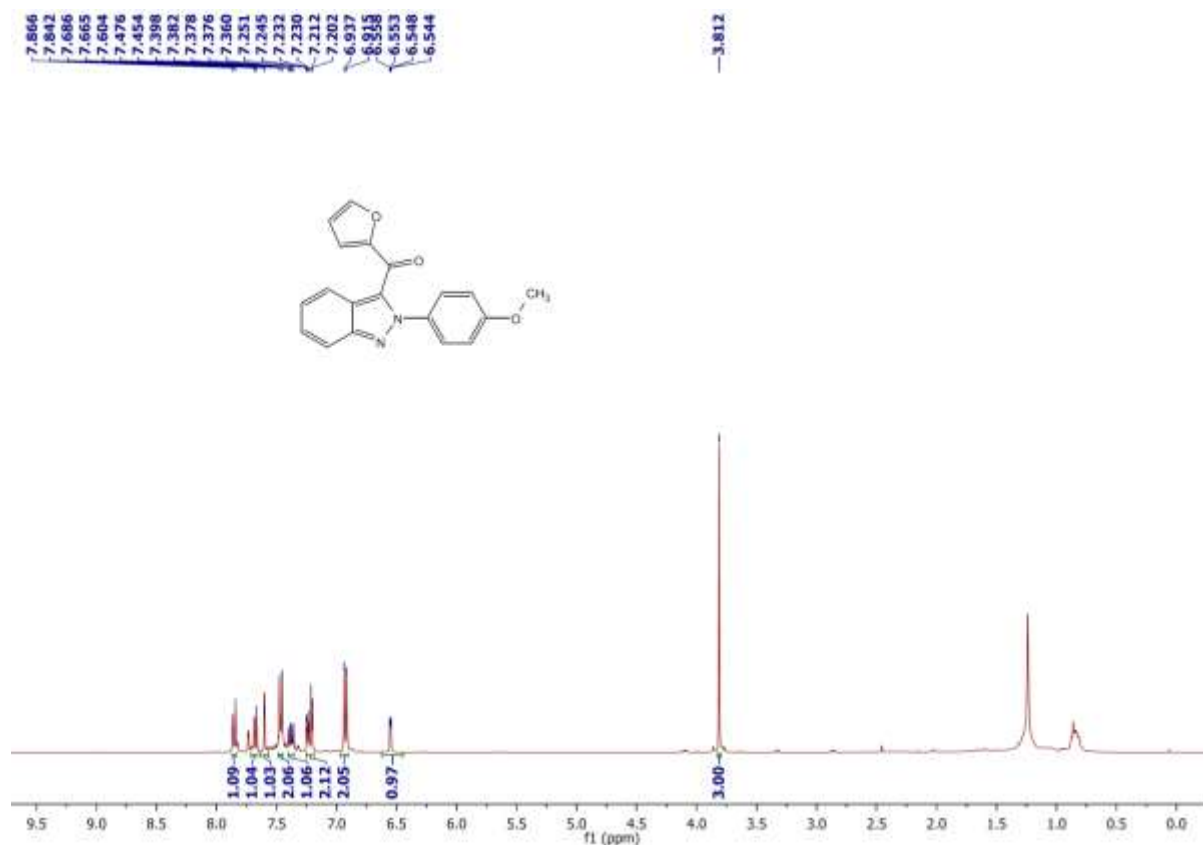

<sup>1</sup>H NMR (400 MHz, Chloroform-*d*) Spectra of **3o**

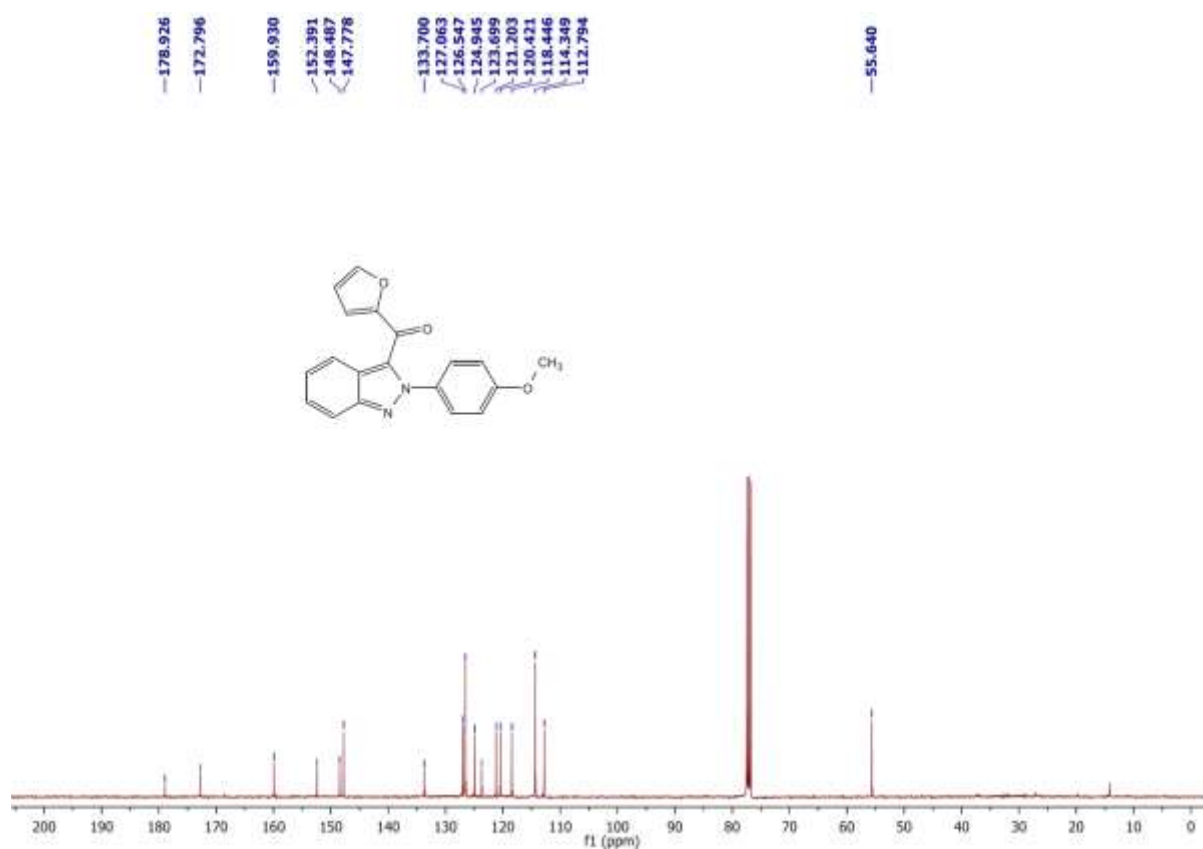

<sup>13</sup>C NMR (100 MHz, Chloroform-*d*) Spectra of **3o**



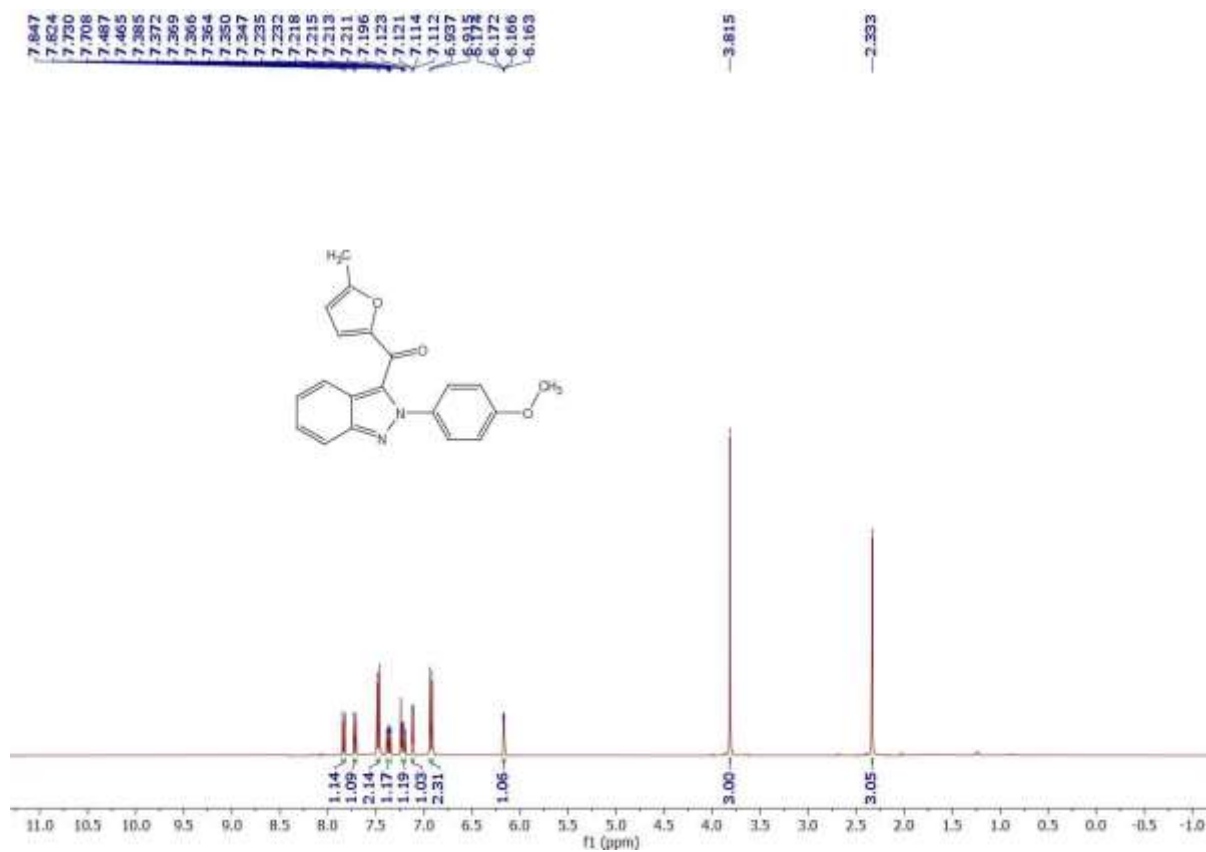

<sup>1</sup>H NMR (400 MHz, Chloroform-*d*) Spectra of **3p**

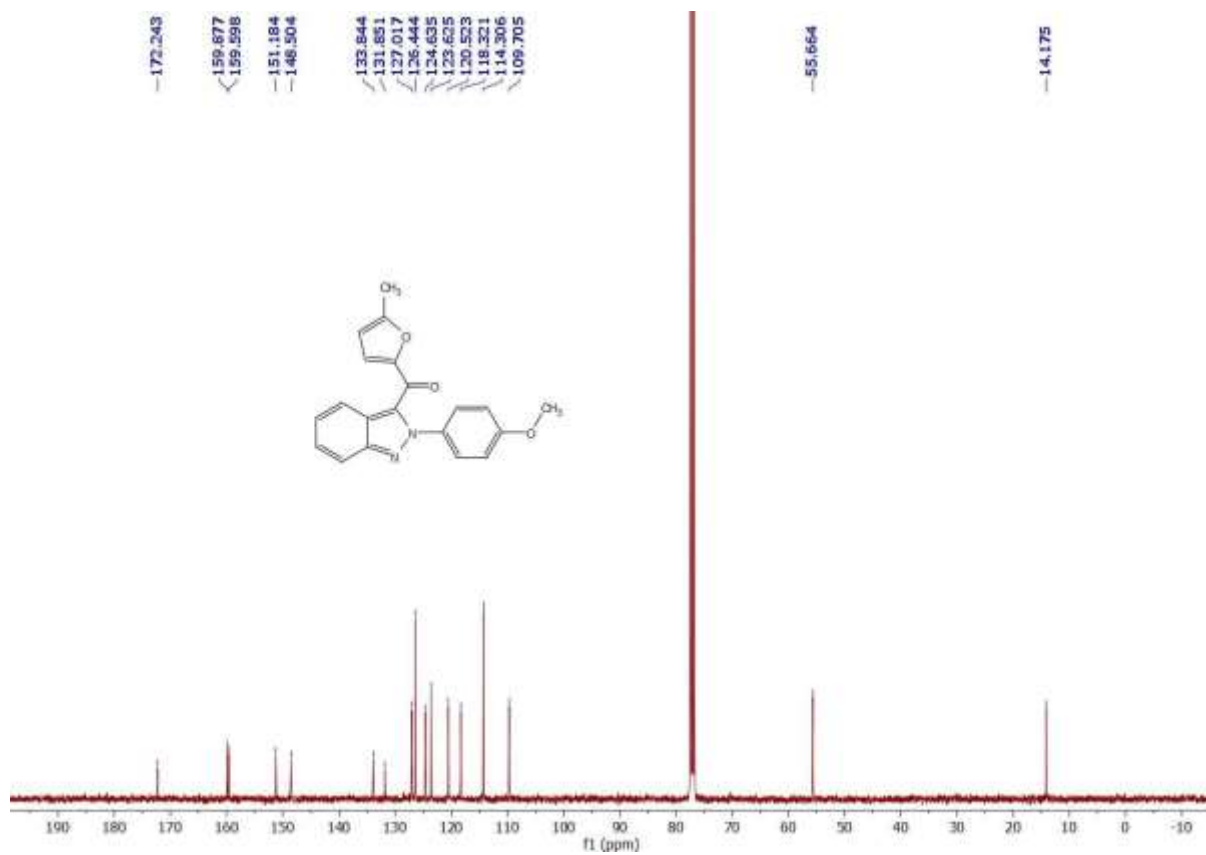

<sup>13</sup>C NMR (100 MHz, Chloroform-*d*) Spectra of **3p**

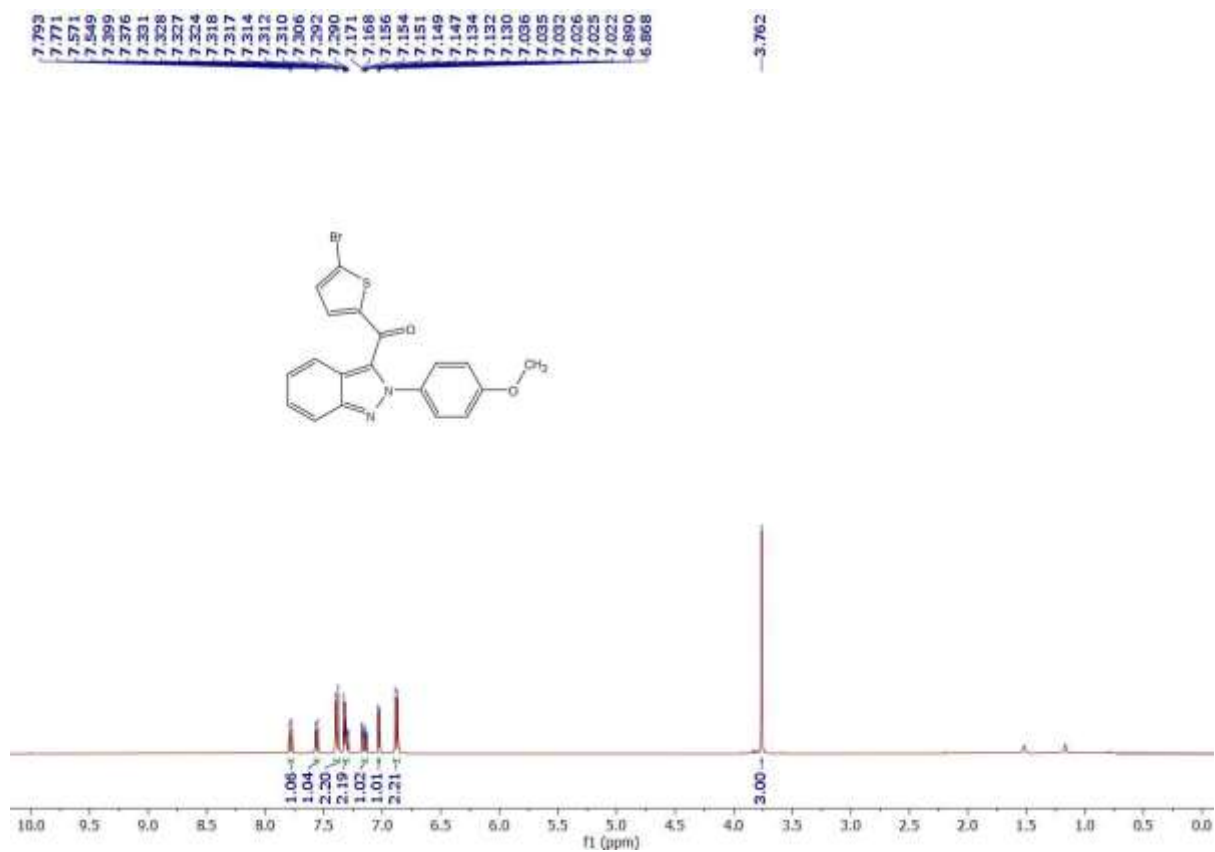

$^1\text{H}$  NMR (400 MHz, Chloroform-*d*) Spectra of **3q**

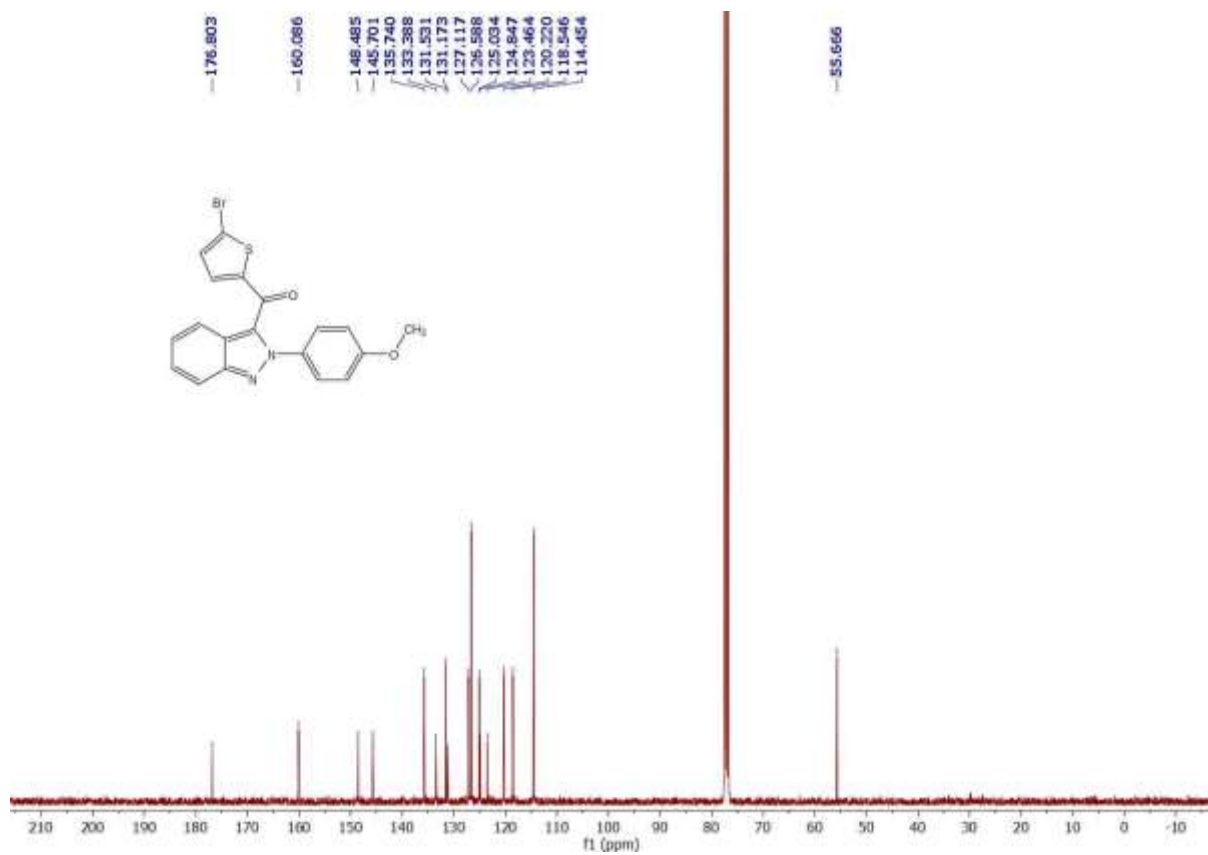

$^{13}\text{C}$  NMR (100 MHz, Chloroform-*d*) Spectra of **3q**

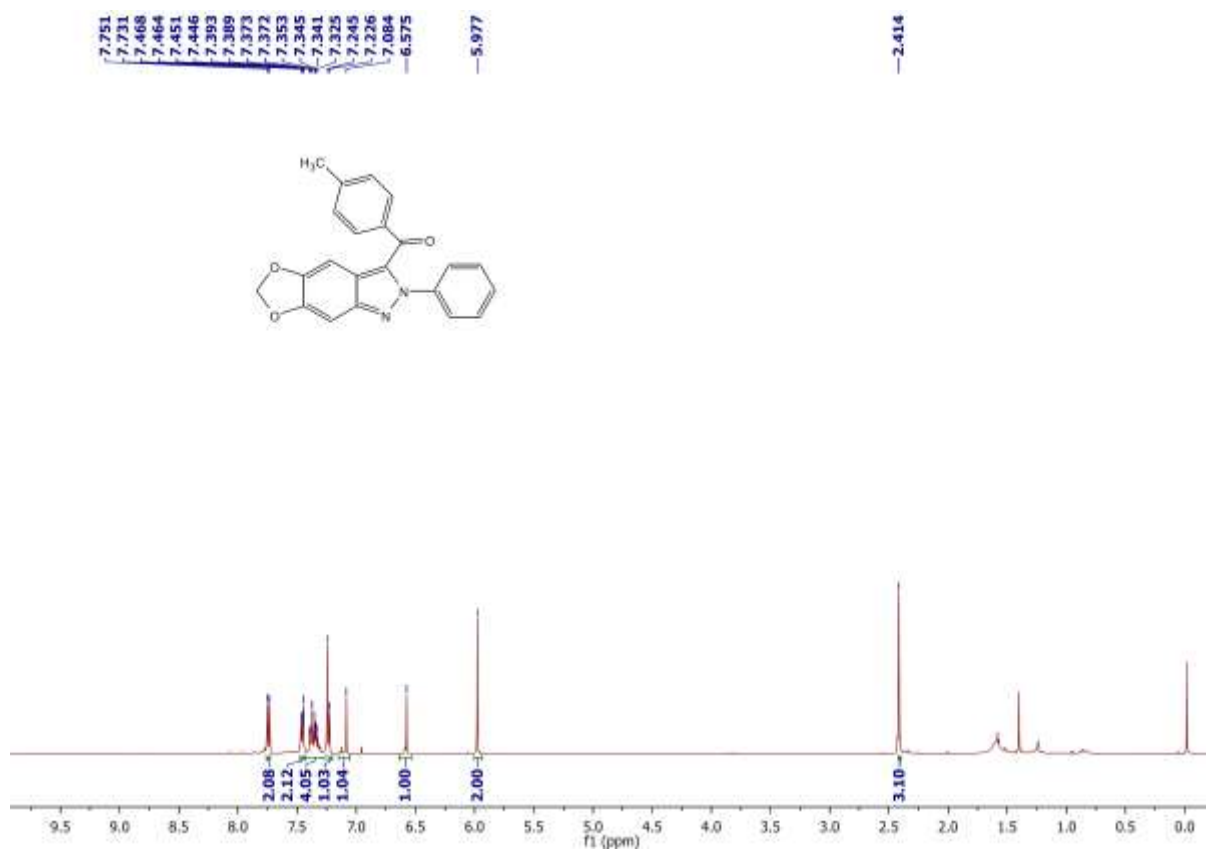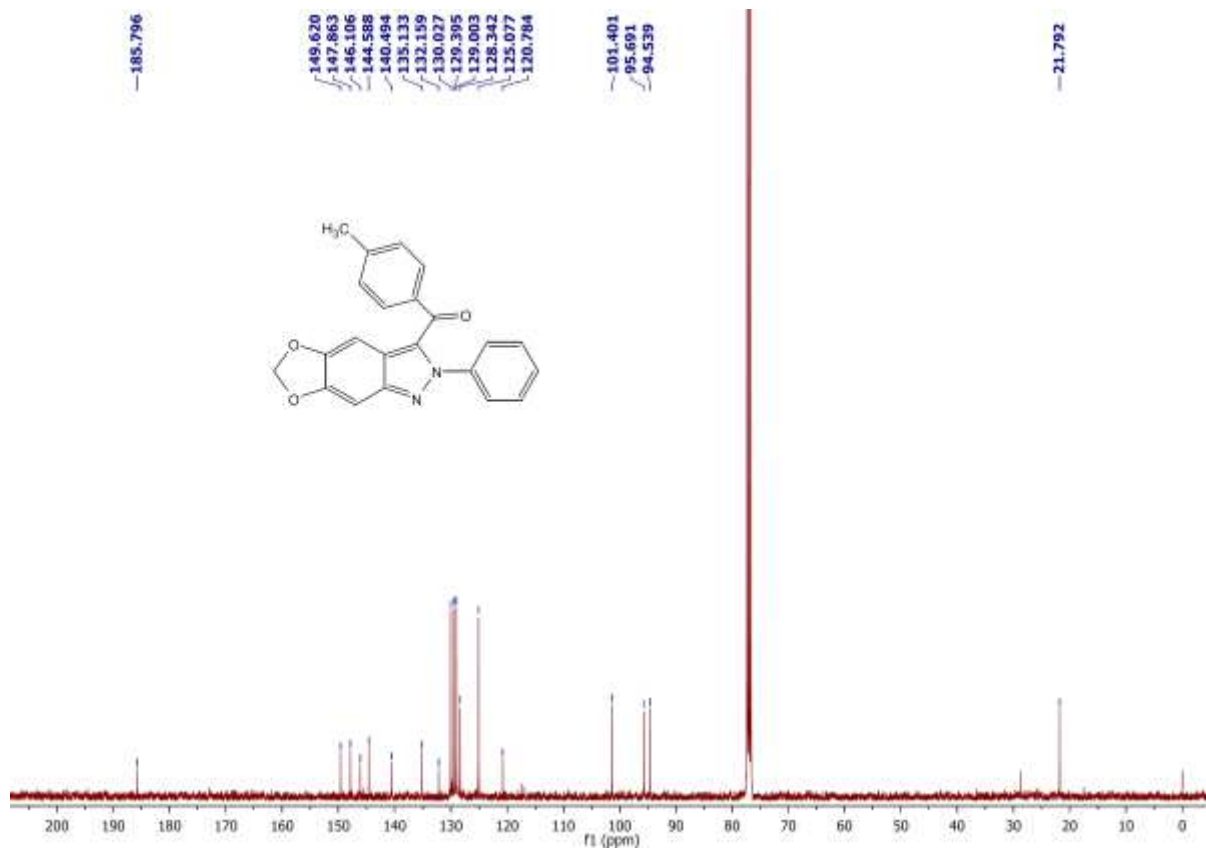

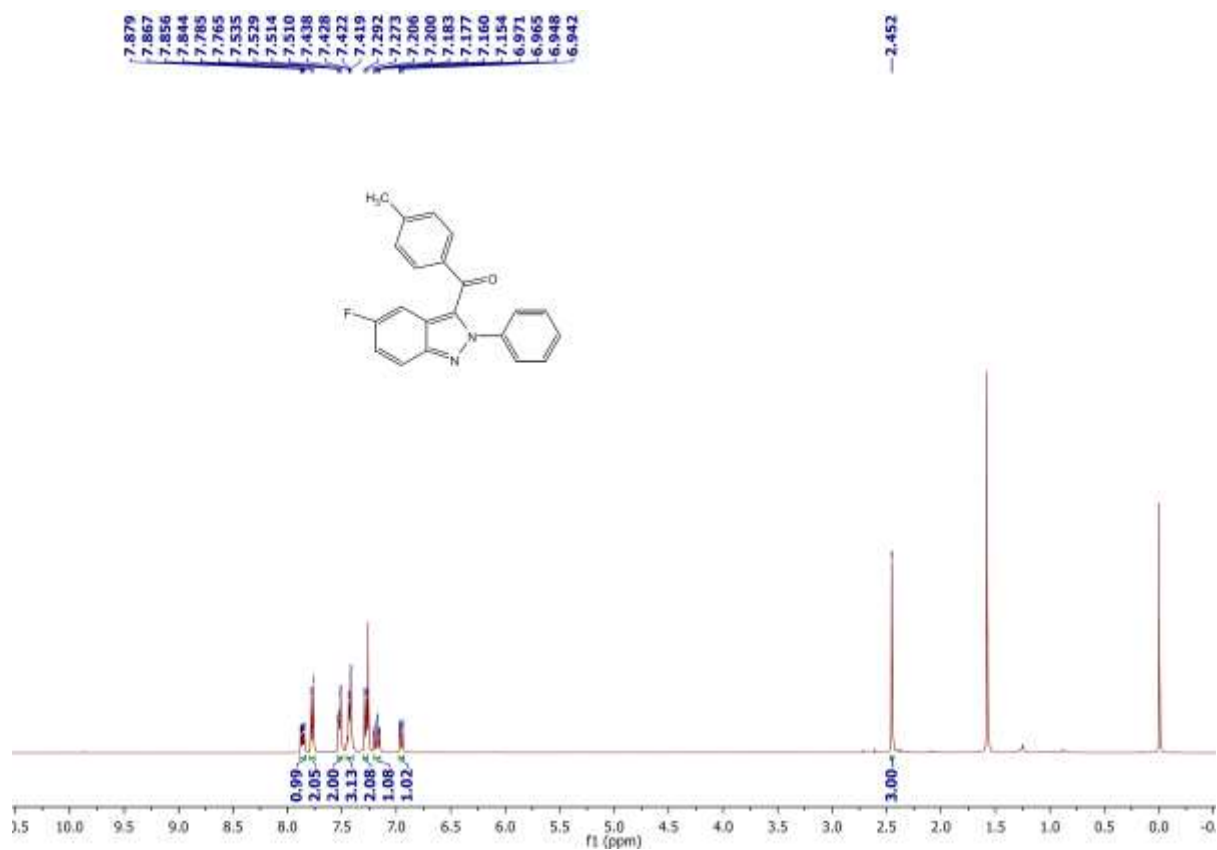

$^1\text{H NMR}$  (400 MHz, Chloroform-*d*) Spectra of **4b**

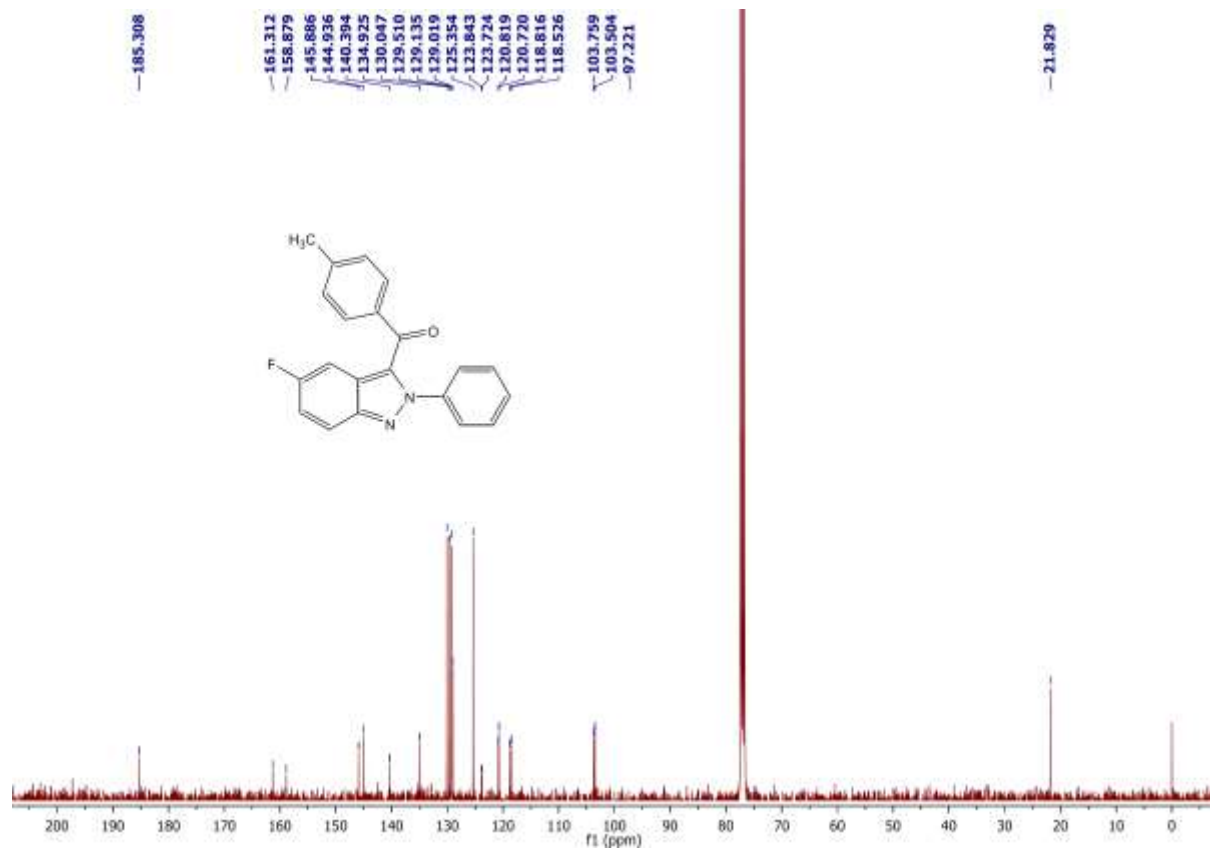

$^{13}\text{C NMR}$  (100 MHz, Chloroform-*d*) Spectra of **4b**

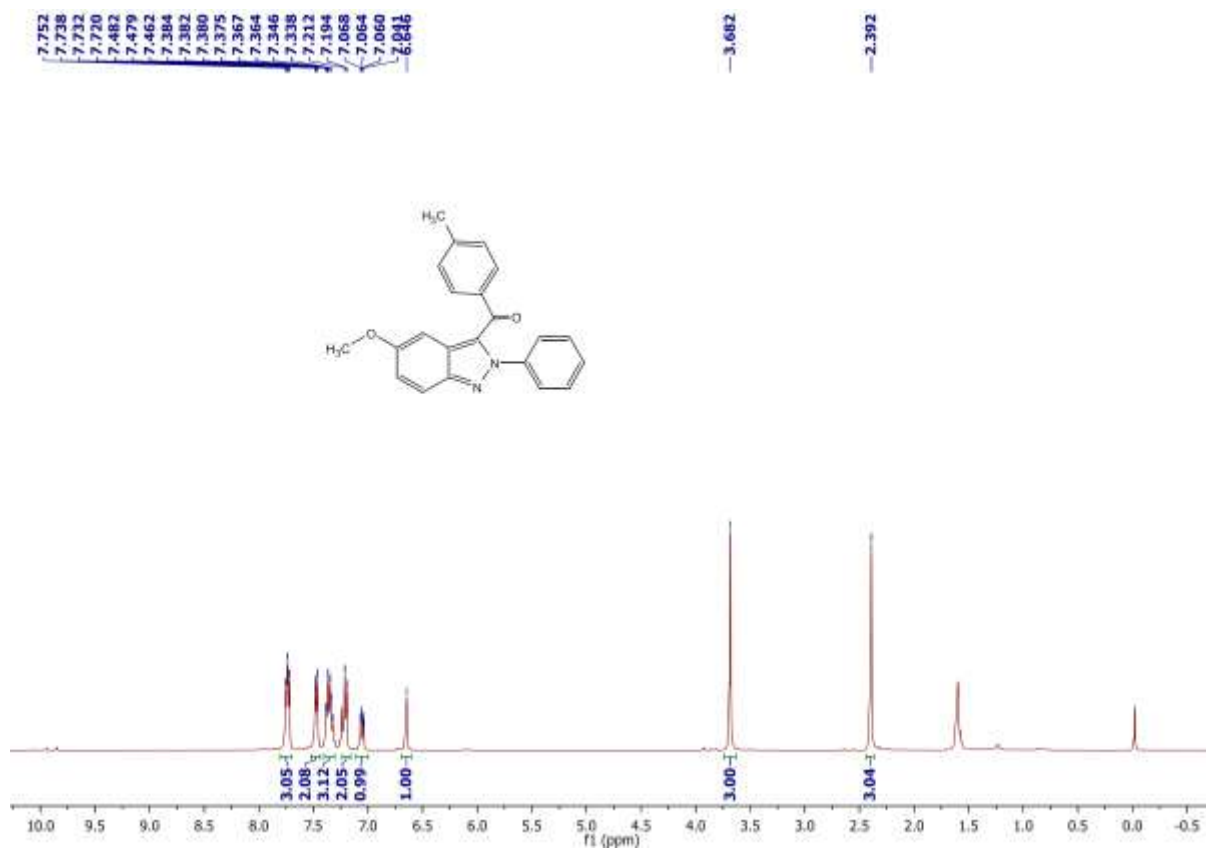

<sup>1</sup>H NMR (400 MHz, Chloroform-*d*) Spectra of **4c**

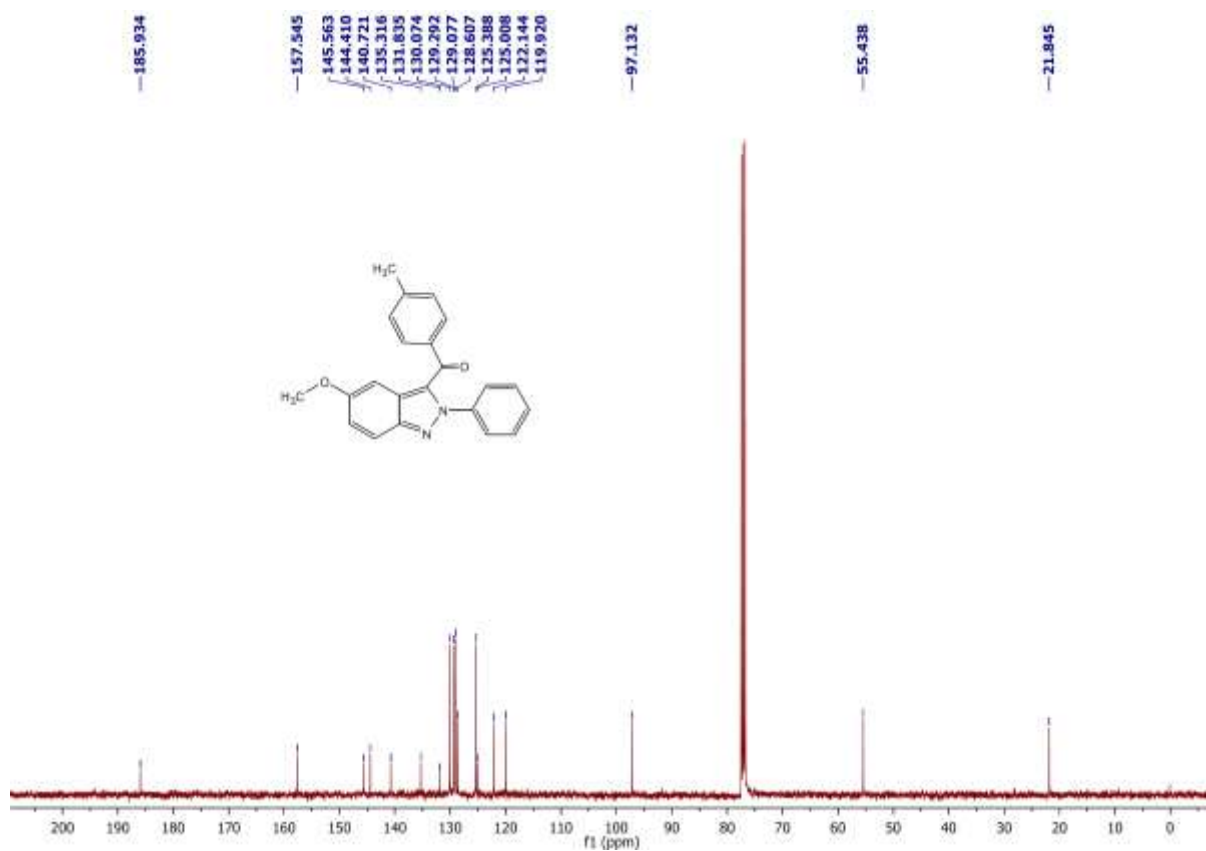

<sup>13</sup>C NMR (100 MHz, Chloroform-*d*) Spectra of **4c**

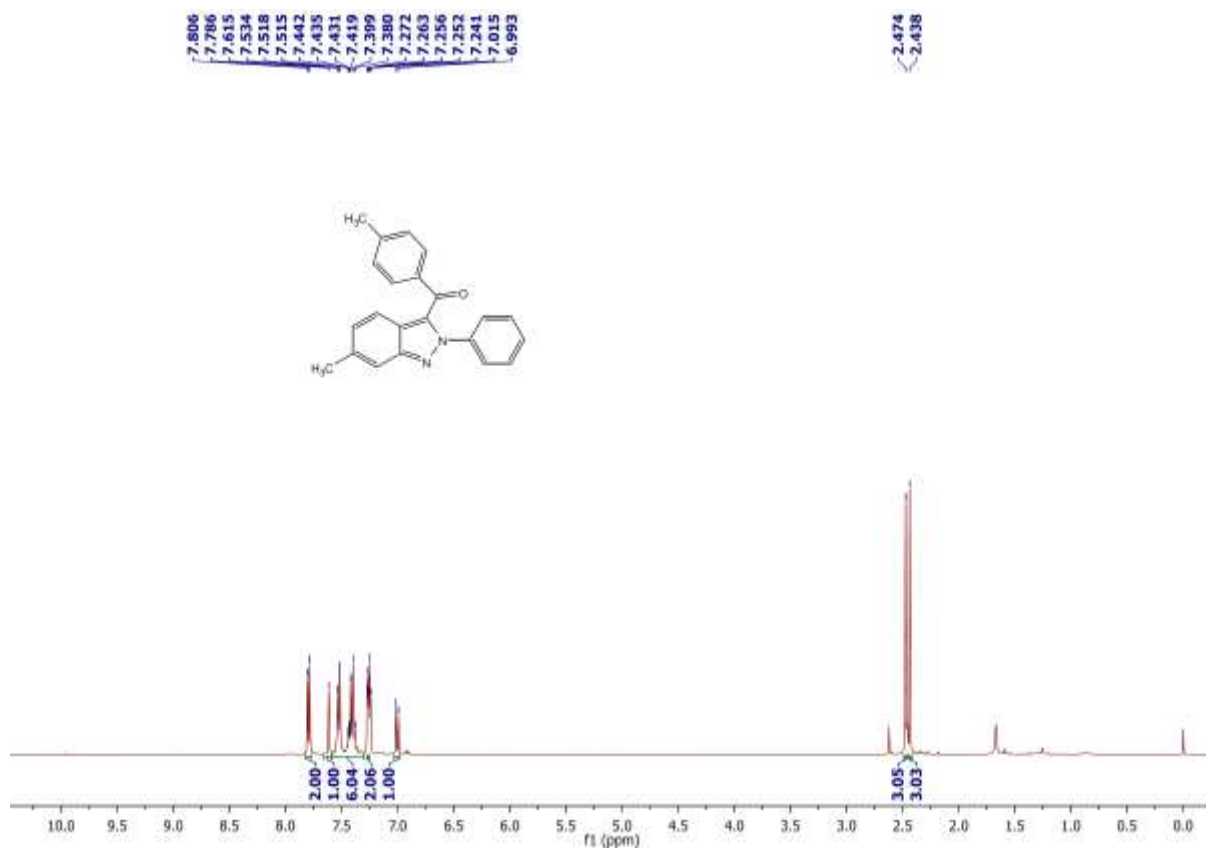

$^1\text{H}$  NMR (400 MHz, Chloroform-*d*) Spectra of **4d**

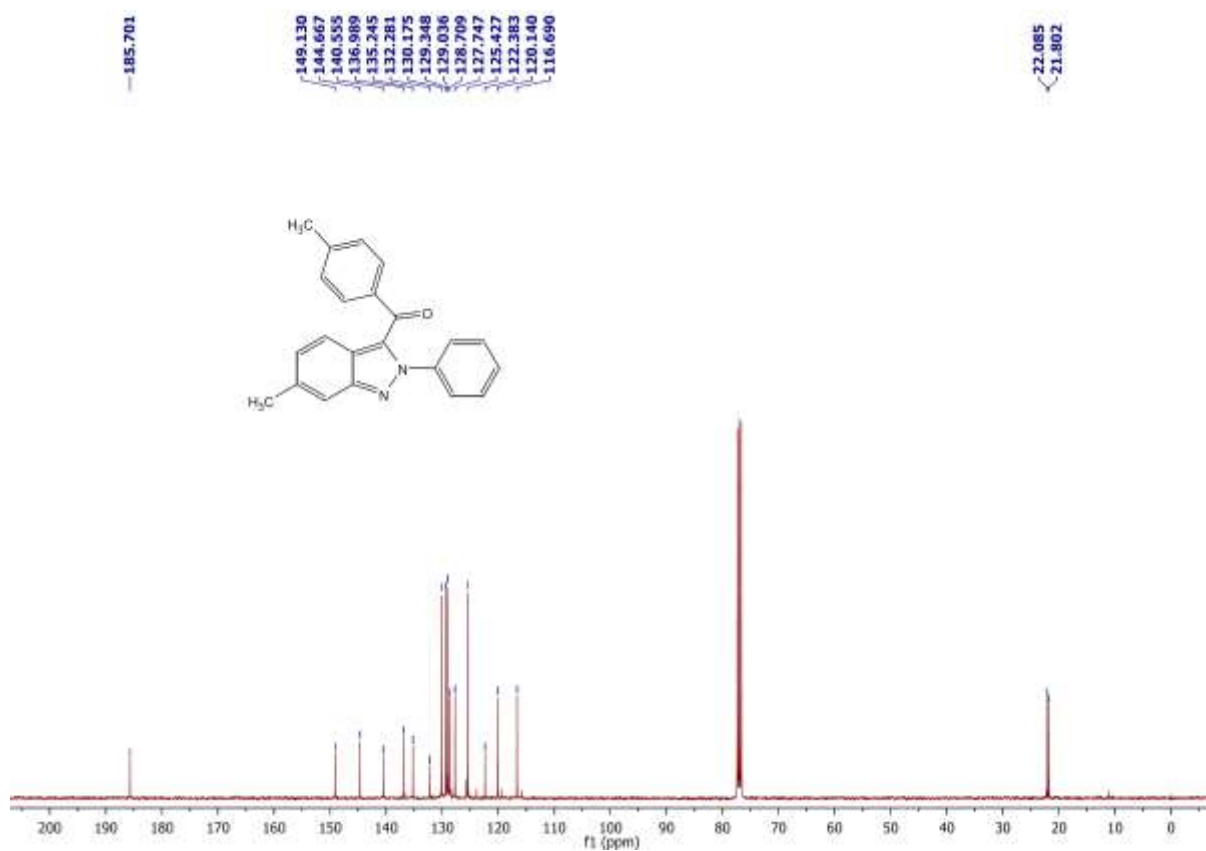

$^{13}\text{C}$  NMR (100 MHz, Chloroform-*d*) Spectra of **4d**

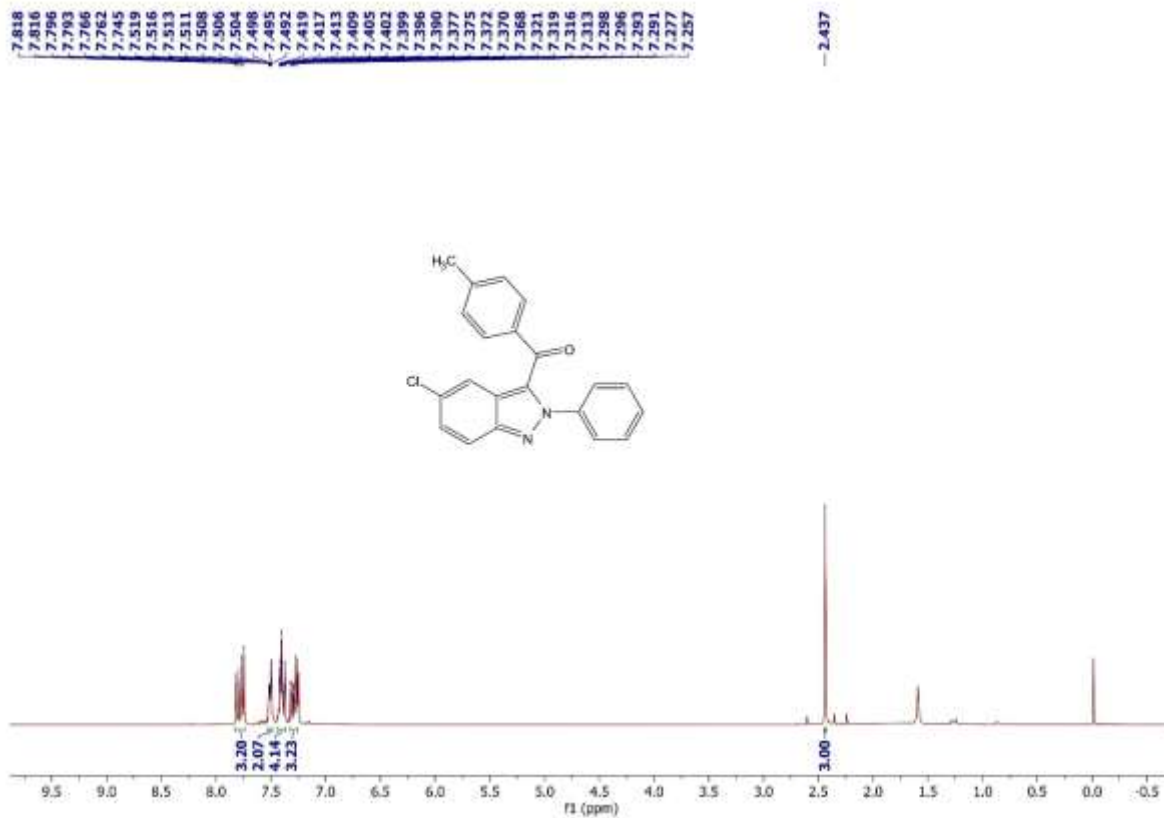

$^1\text{H}$  NMR (400 MHz, Chloroform-*d*) Spectra of **4e**

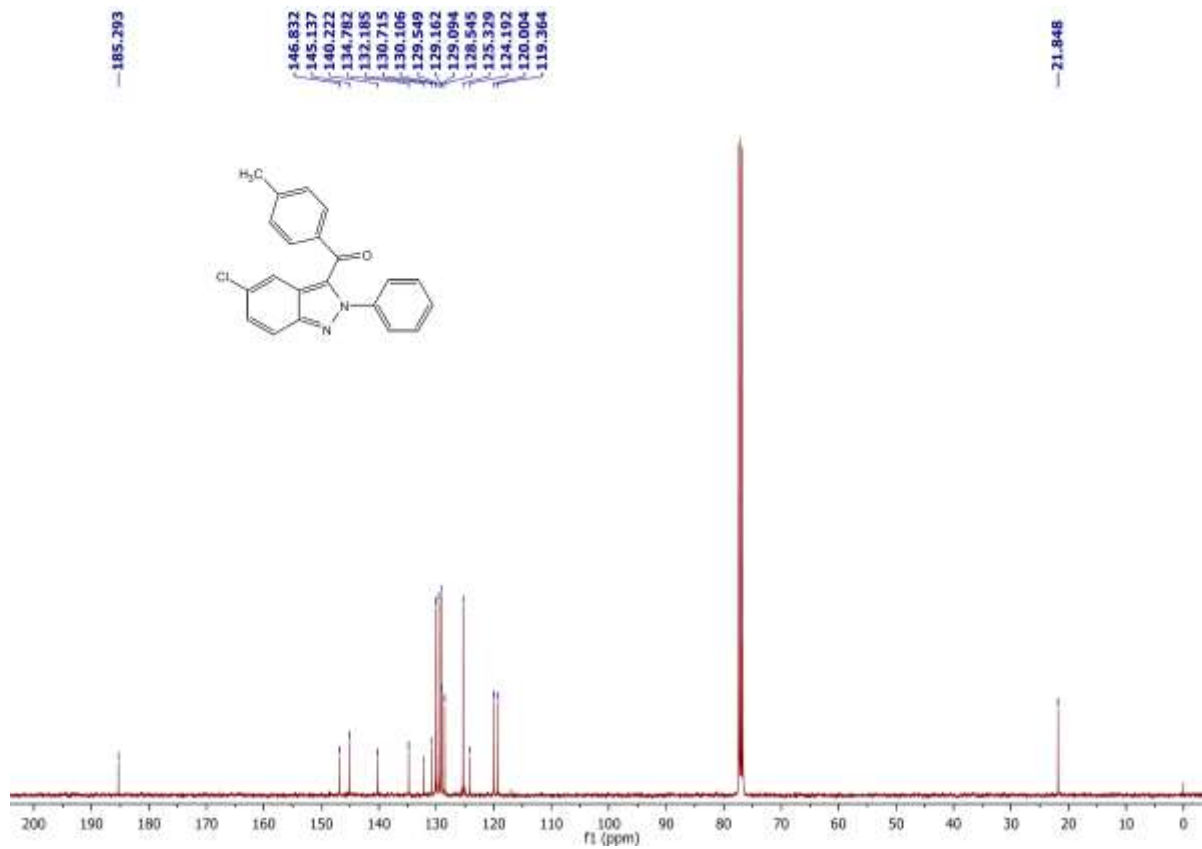

$^{13}\text{C}$  NMR (100 MHz, Chloroform-*d*) Spectra of **4e**

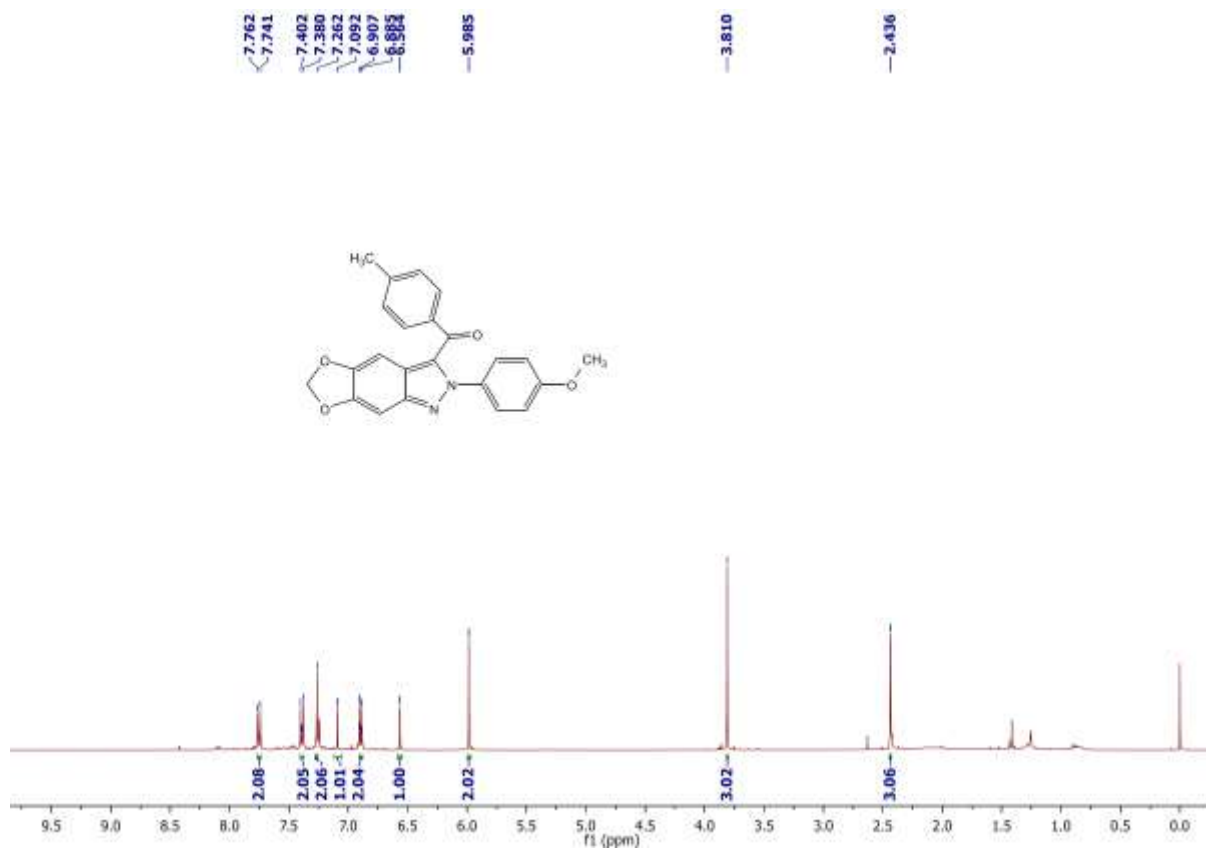

<sup>1</sup>H NMR (400 MHz, Chloroform-*d*) Spectra of **4f**

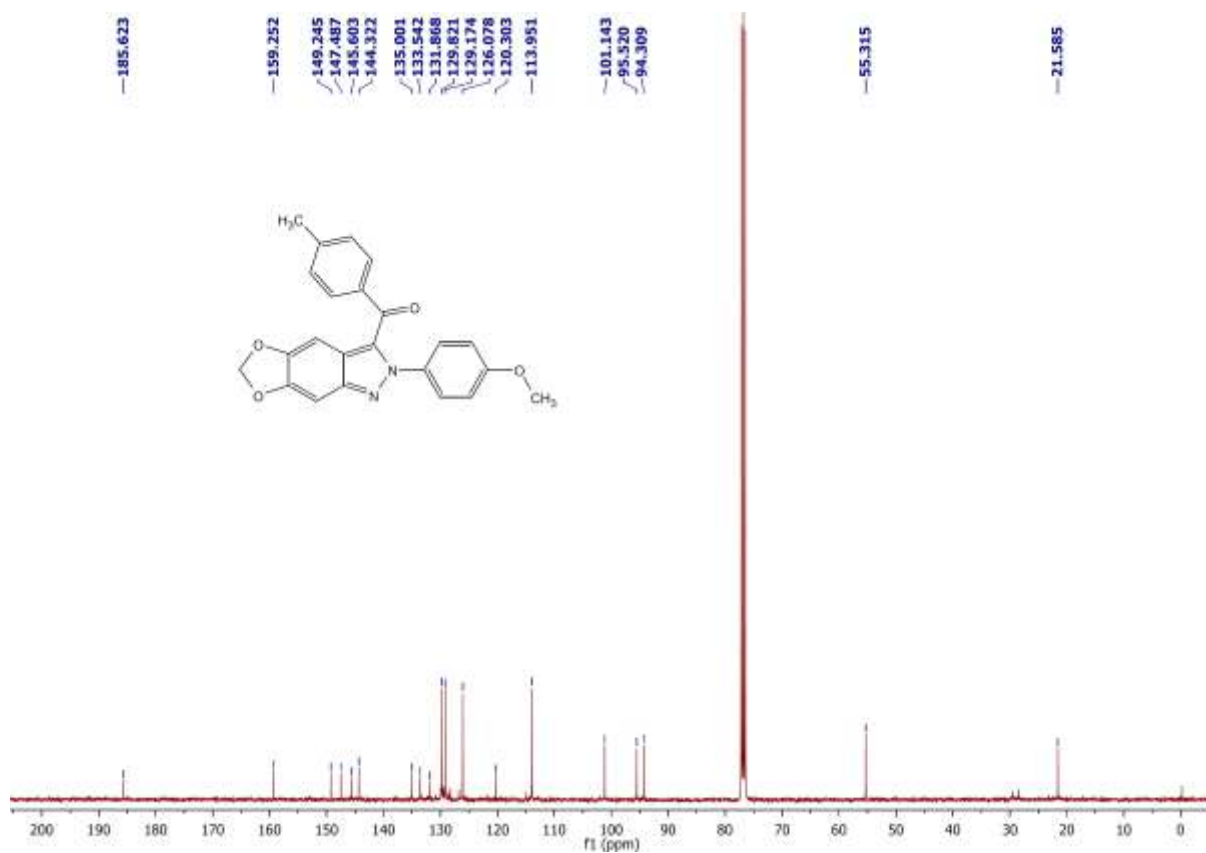

<sup>13</sup>C NMR (100 MHz, Chloroform-*d*) Spectra of **4f**



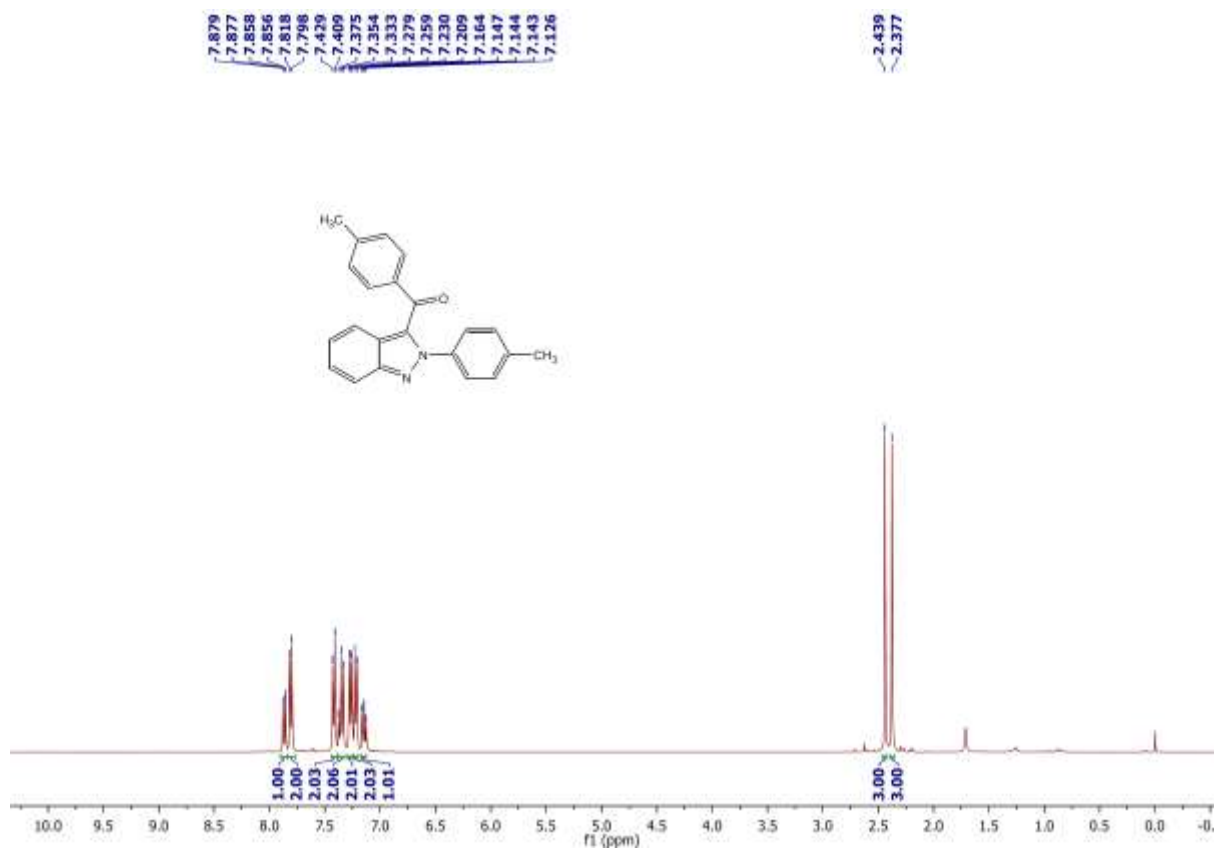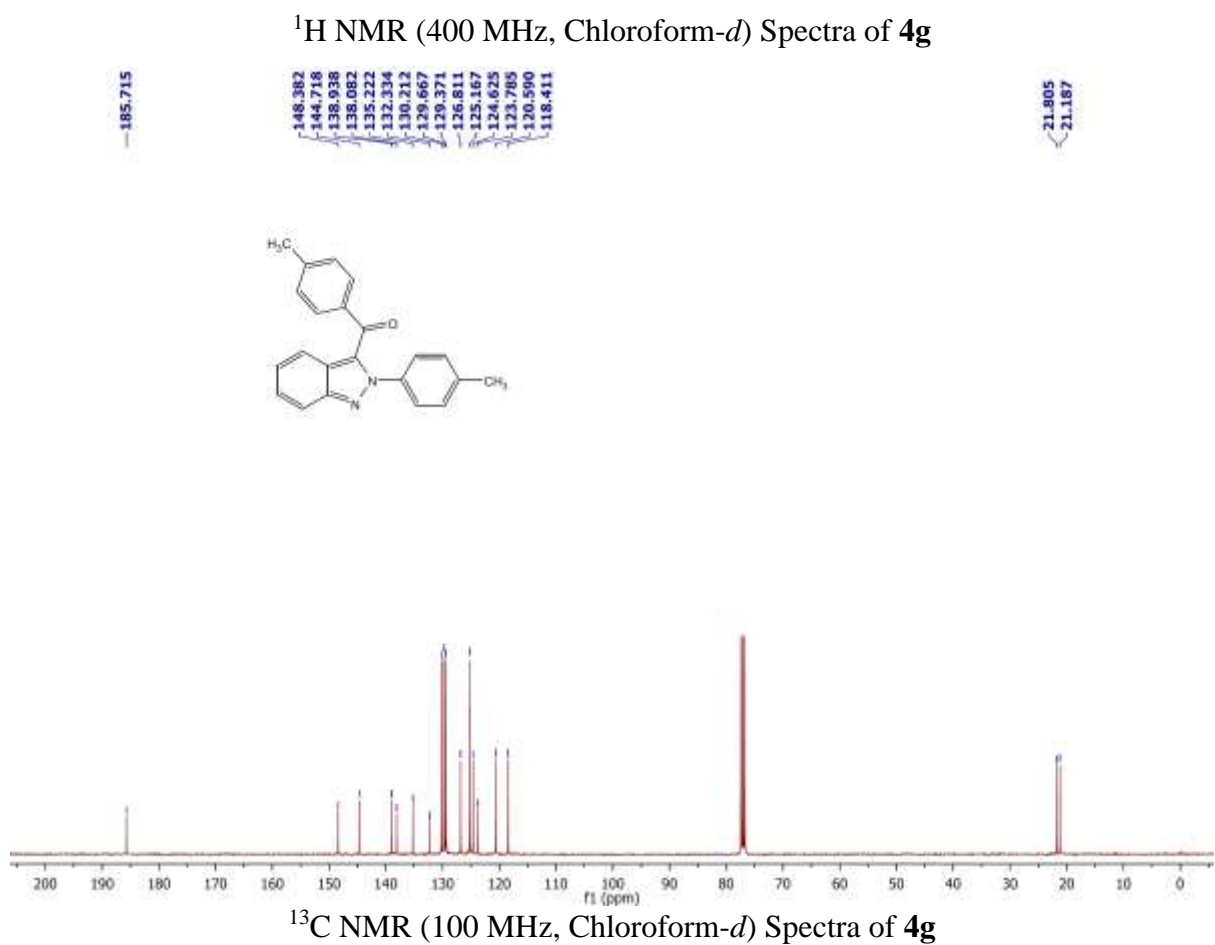

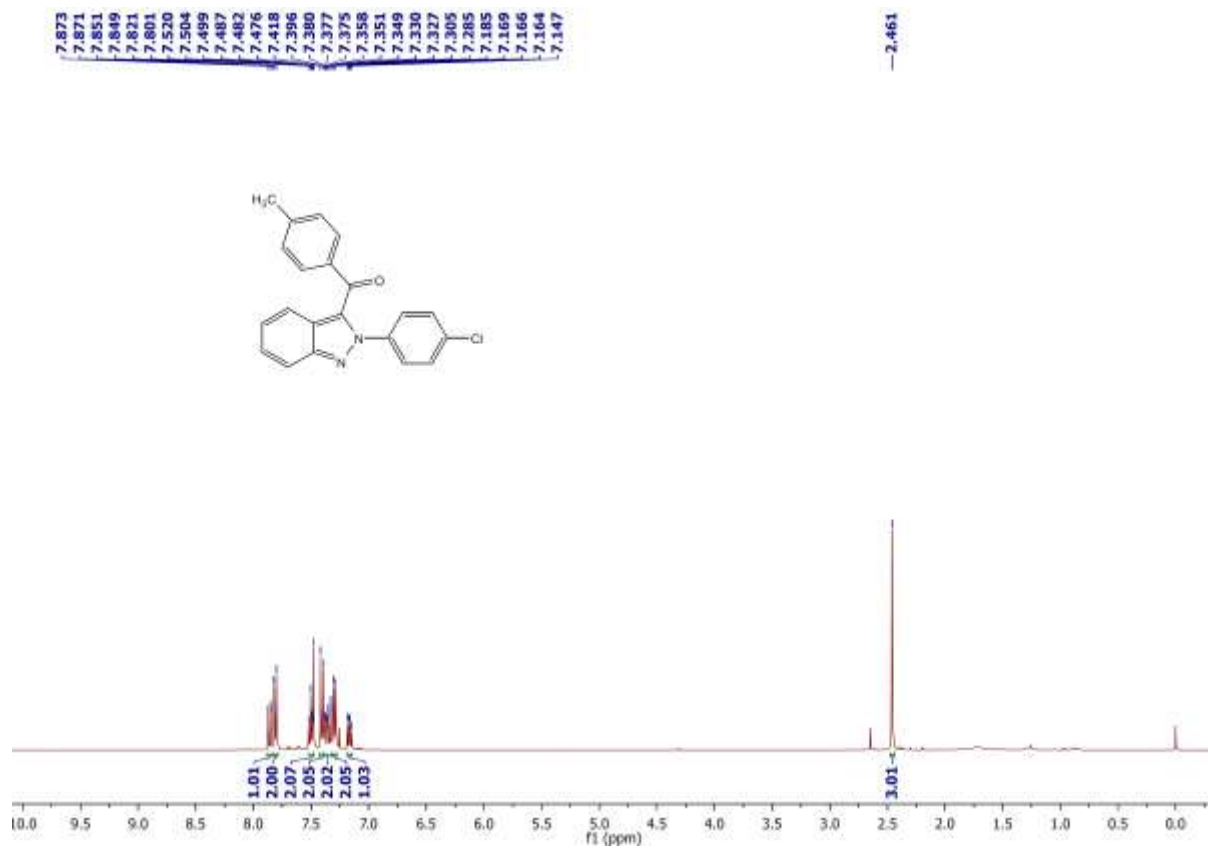

$^1\text{H}$  NMR (400 MHz, Chloroform-*d*) Spectra of **4h**

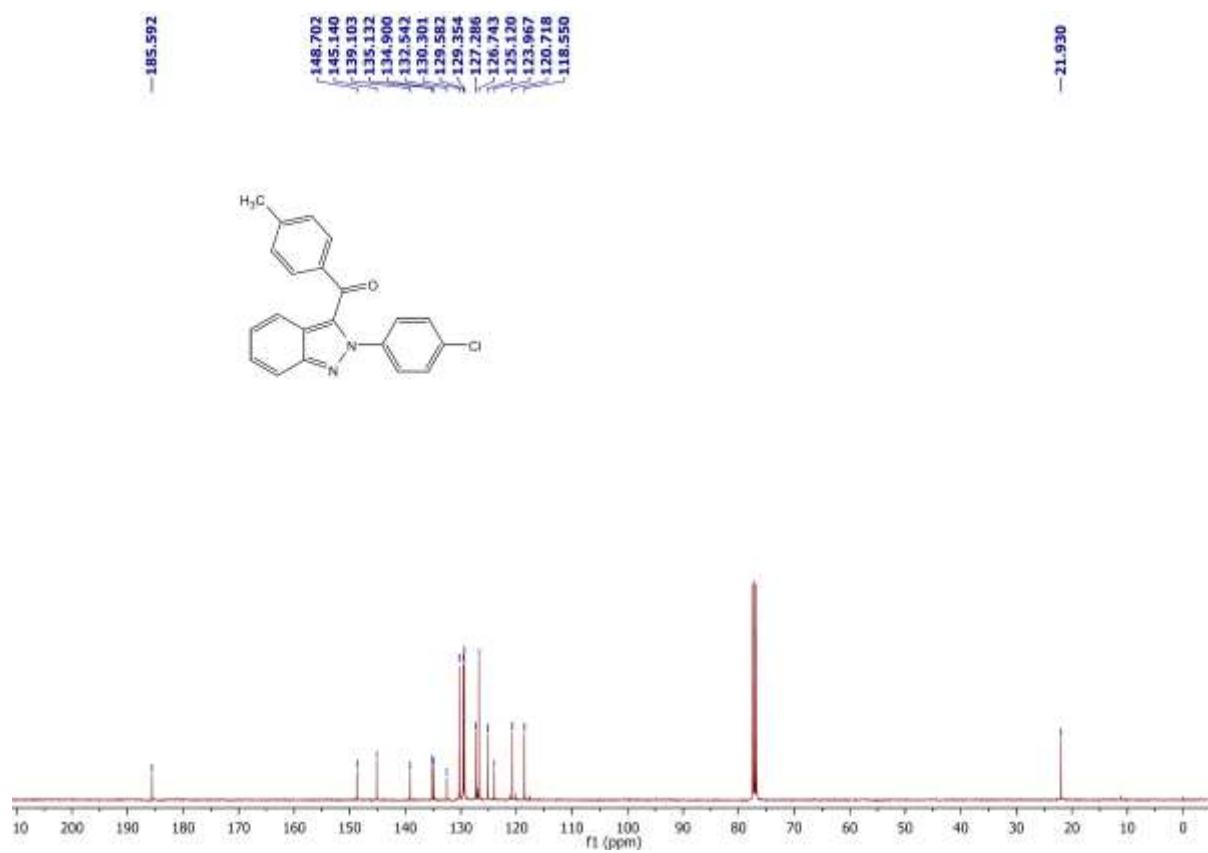

$^{13}\text{C}$  NMR (100 MHz, Chloroform-*d*) Spectra of **4h**

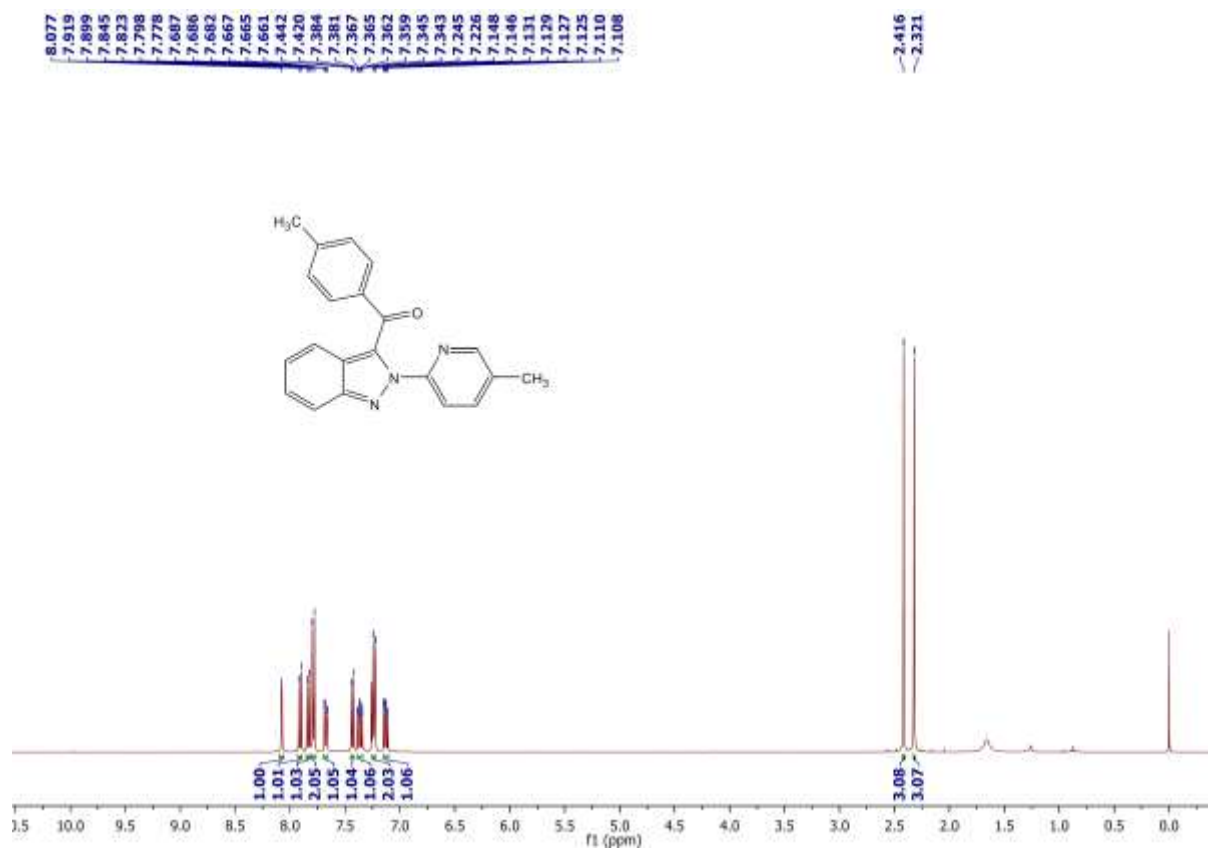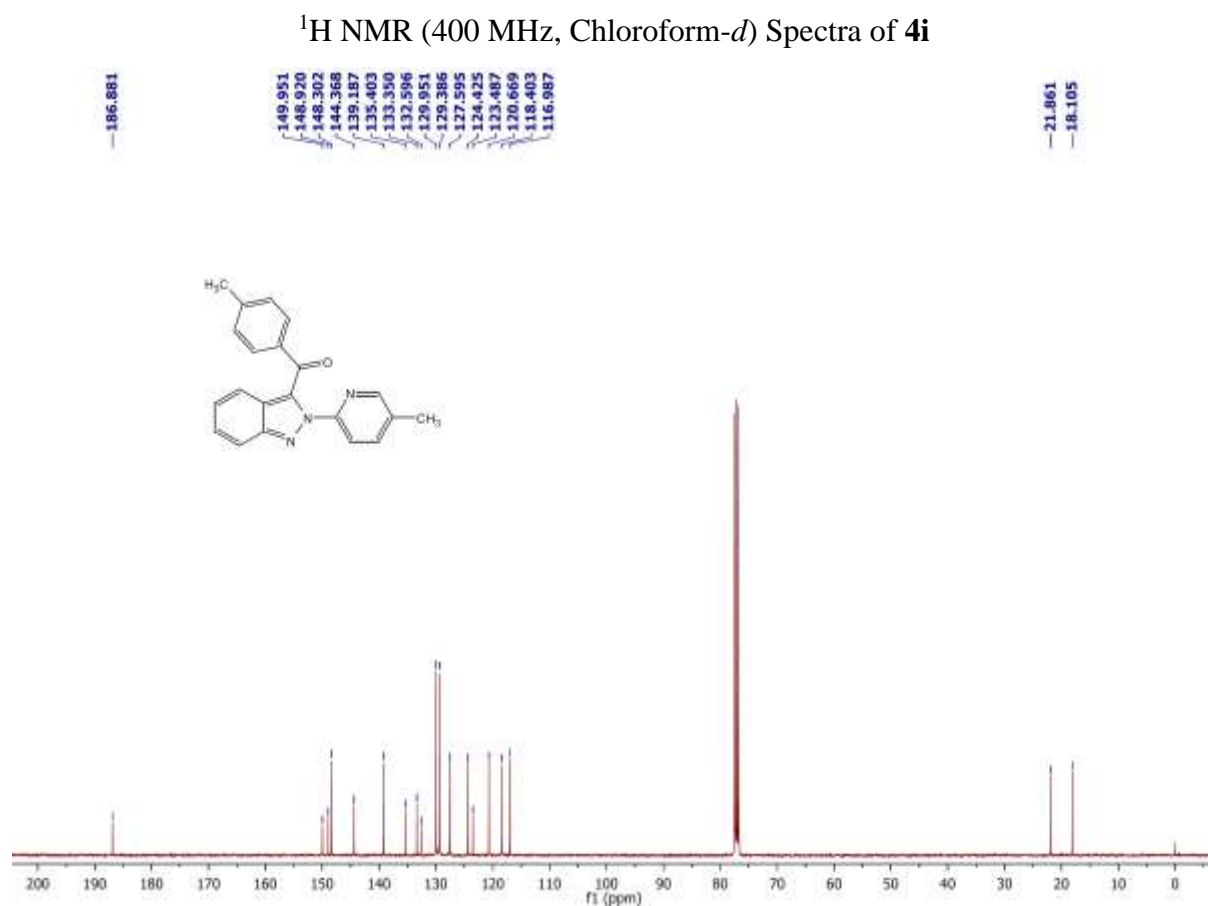

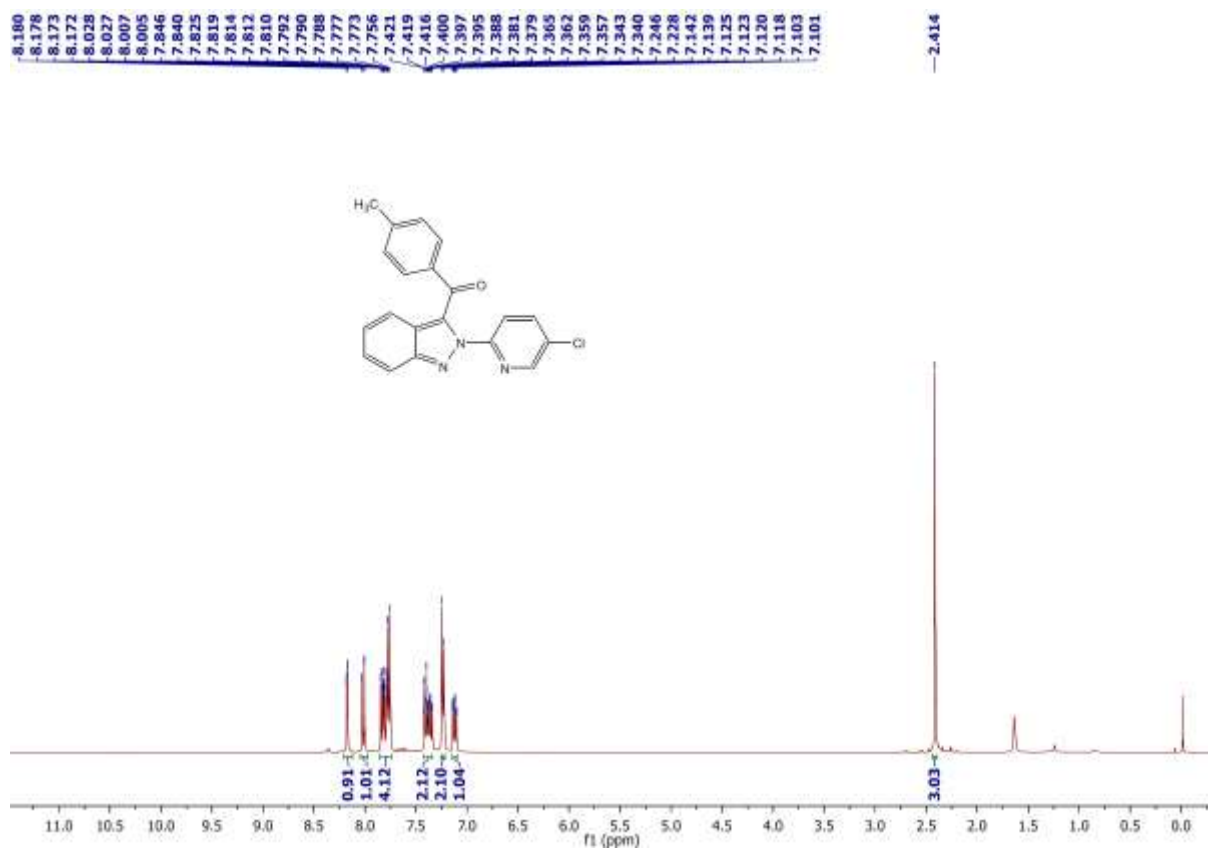

<sup>1</sup>H NMR (400 MHz, Chloroform-*d*) Spectra of **4j**

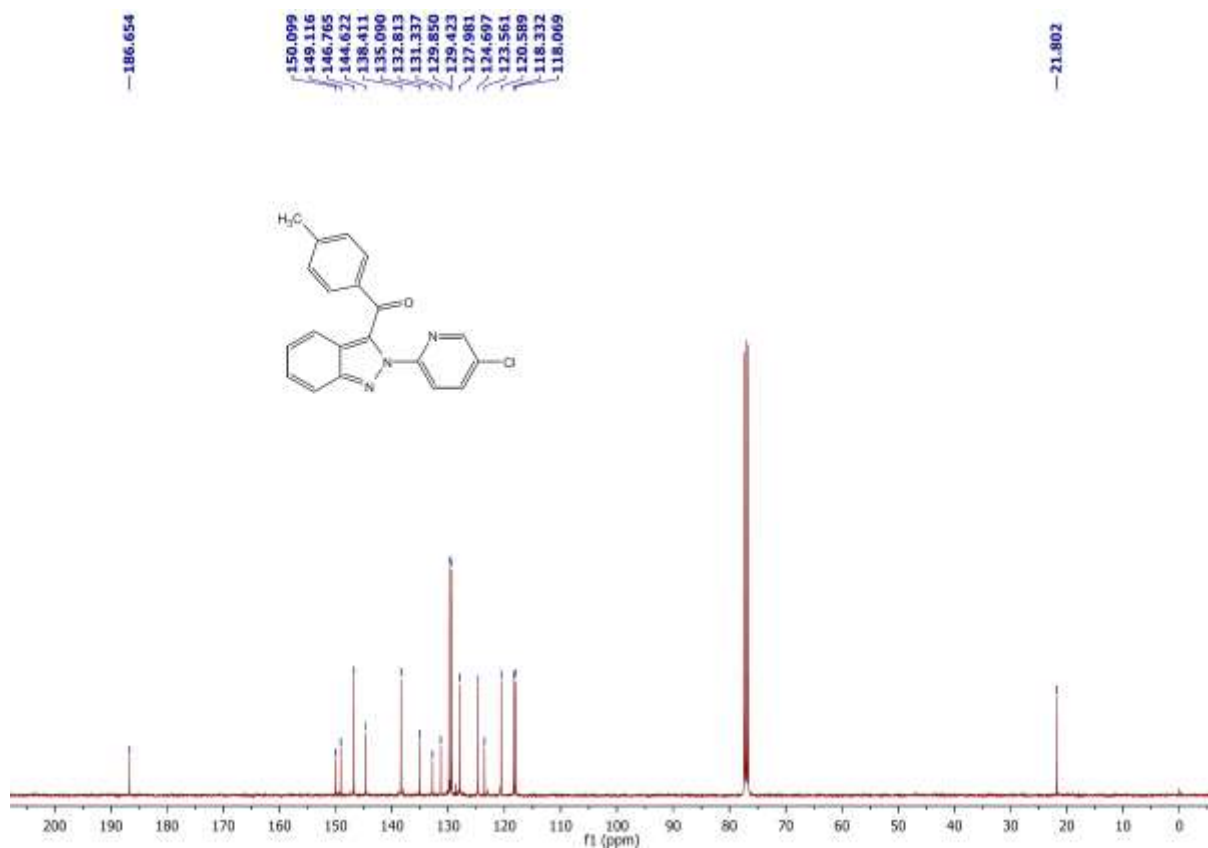

<sup>13</sup>C NMR (100 MHz, Chloroform-*d*) Spectra of **4j**

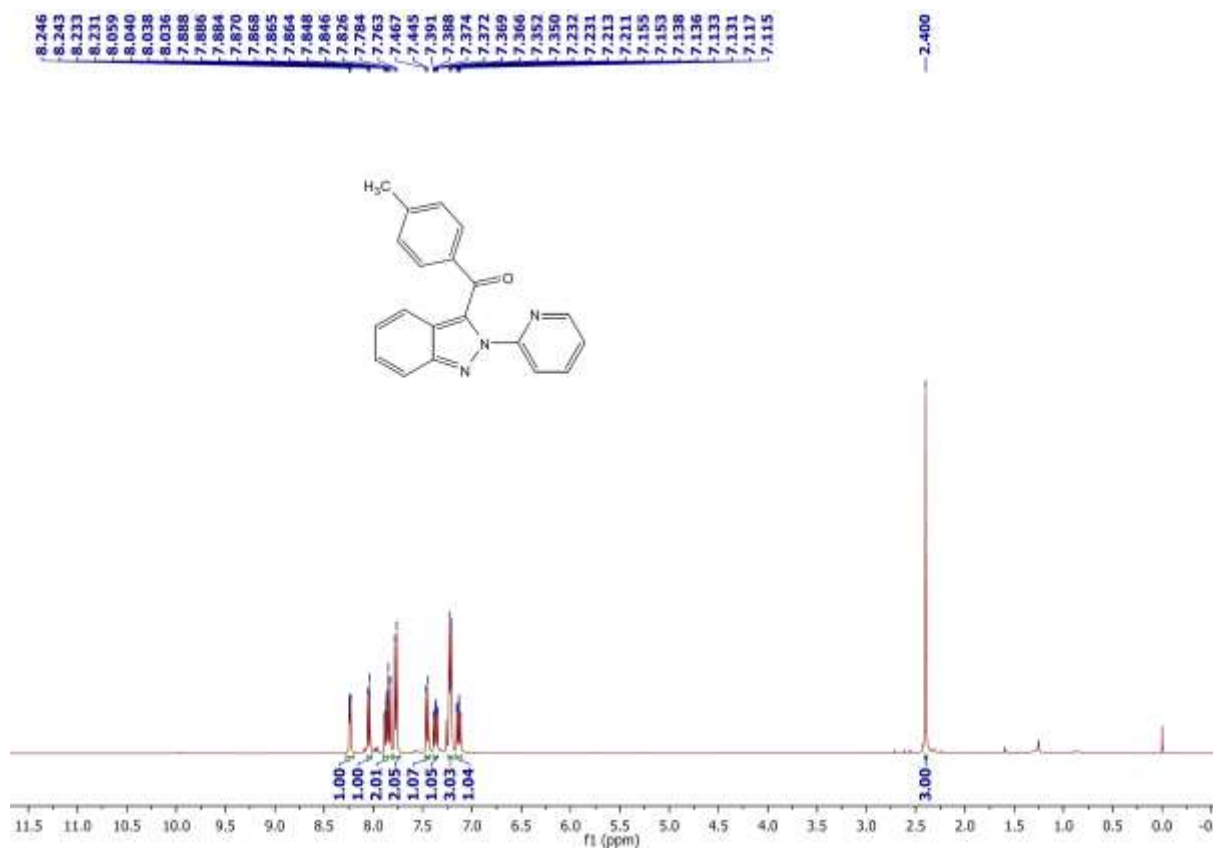

<sup>1</sup>H NMR (400 MHz, Chloroform-*d*) Spectra of **4k**

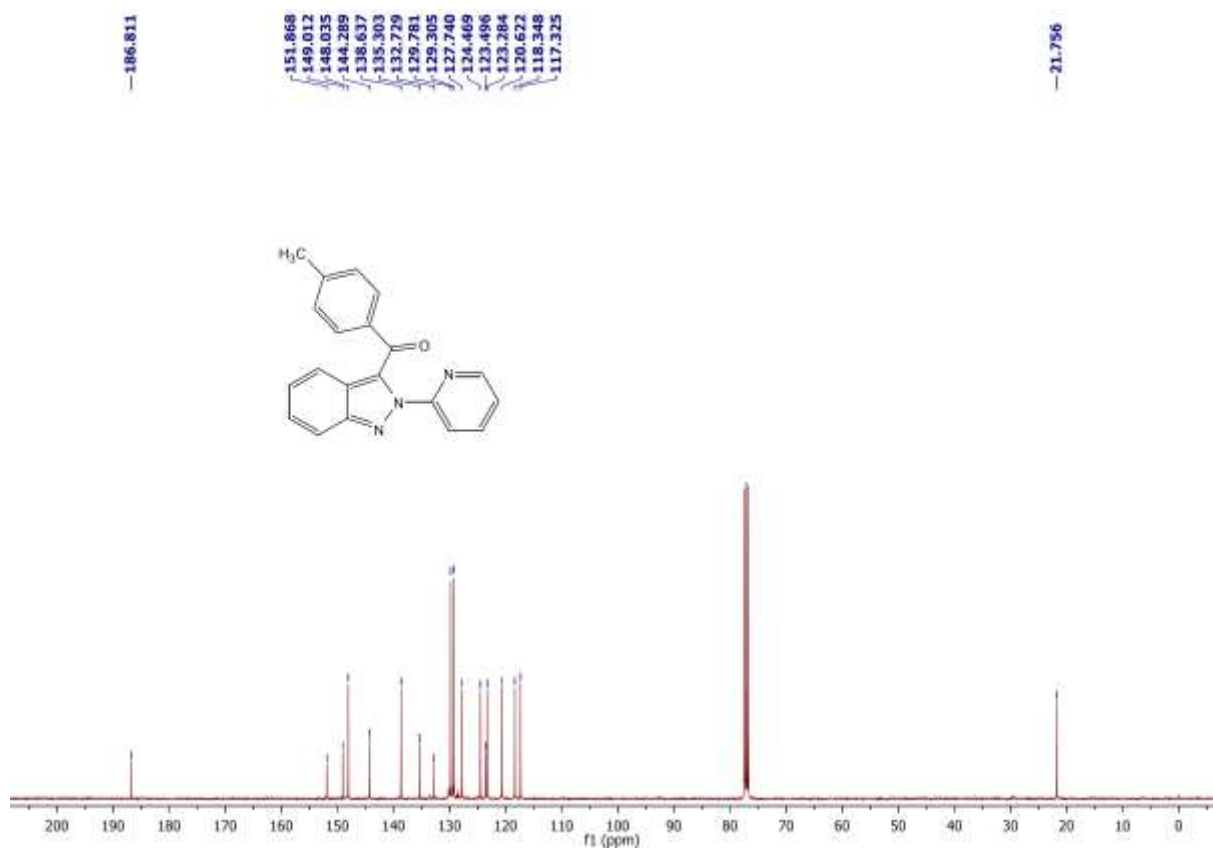

<sup>13</sup>C NMR (100 MHz, Chloroform-*d*) Spectra of **4k**

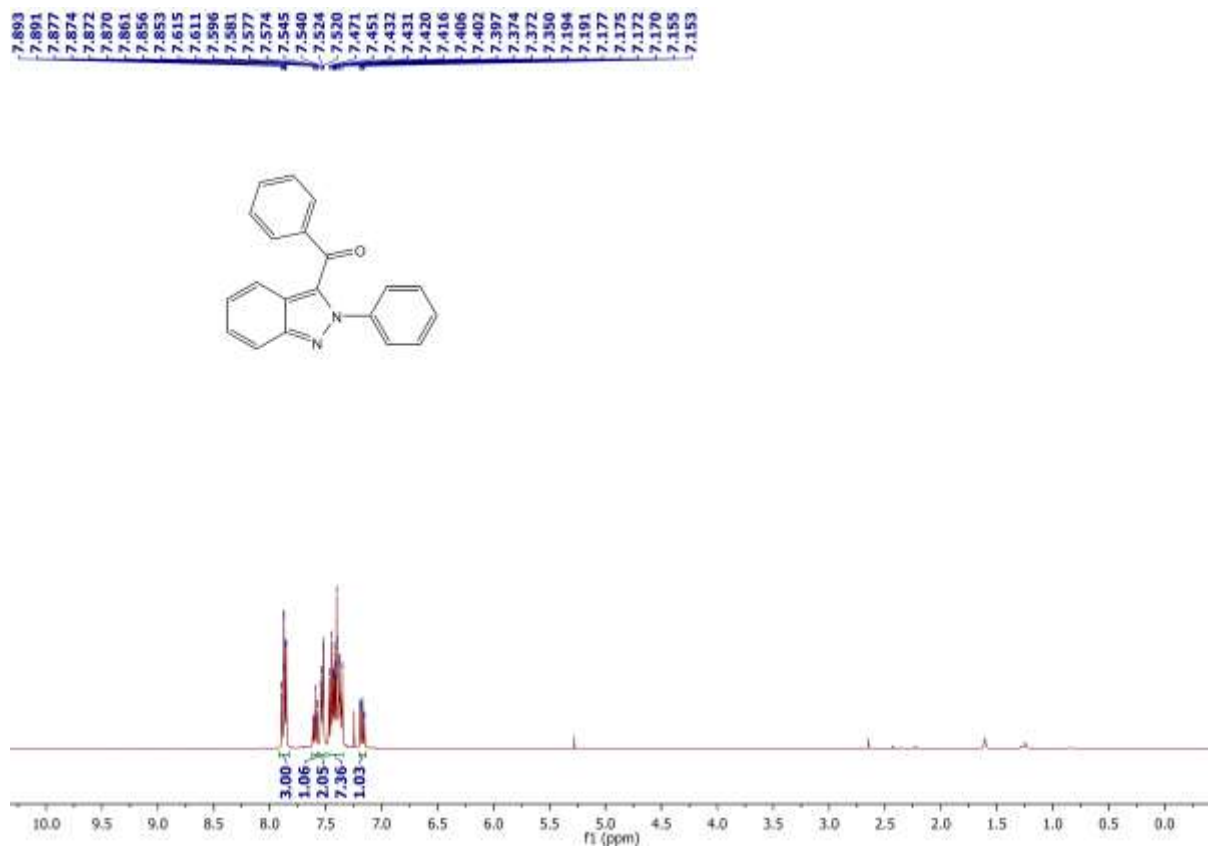

<sup>1</sup>H NMR (400 MHz, Chloroform-*d*) Spectra of **4I**

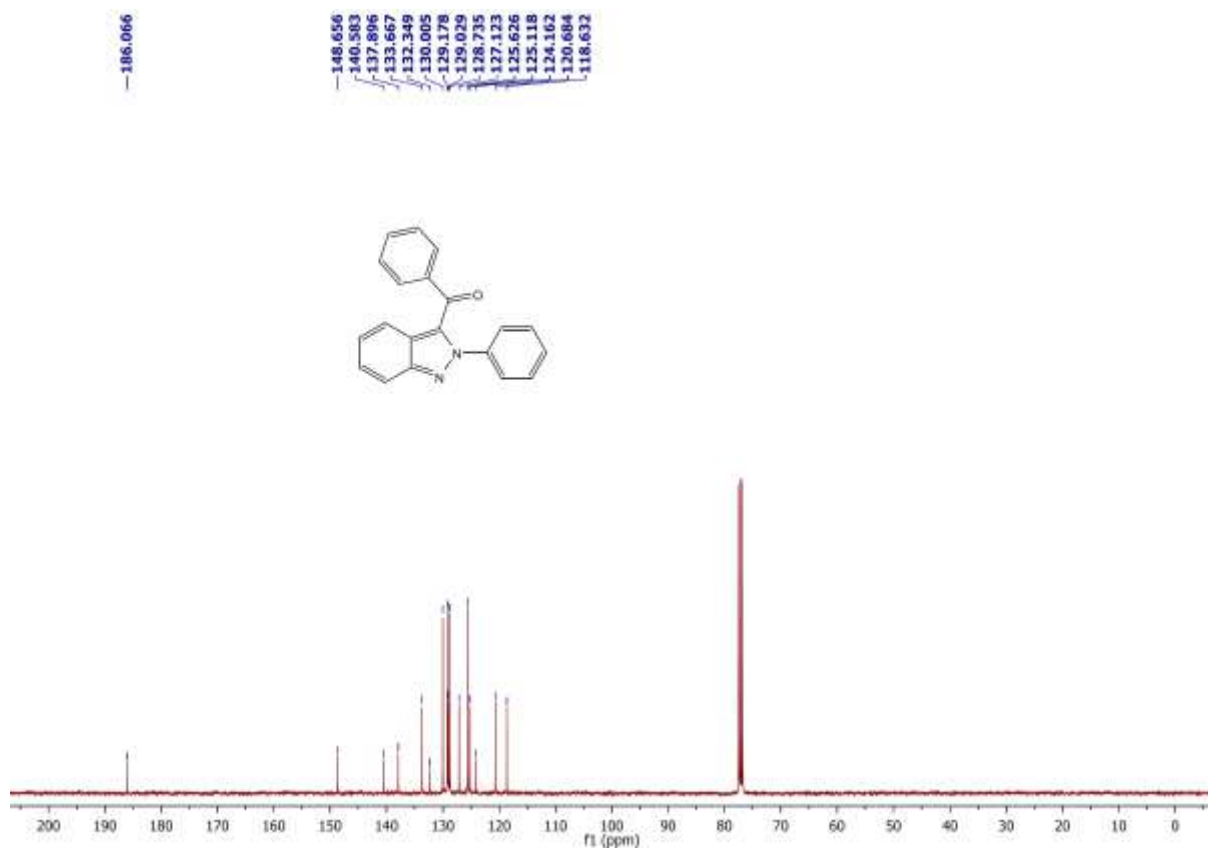

<sup>13</sup>C NMR (100 MHz, Chloroform-*d*) Spectra of **4I**

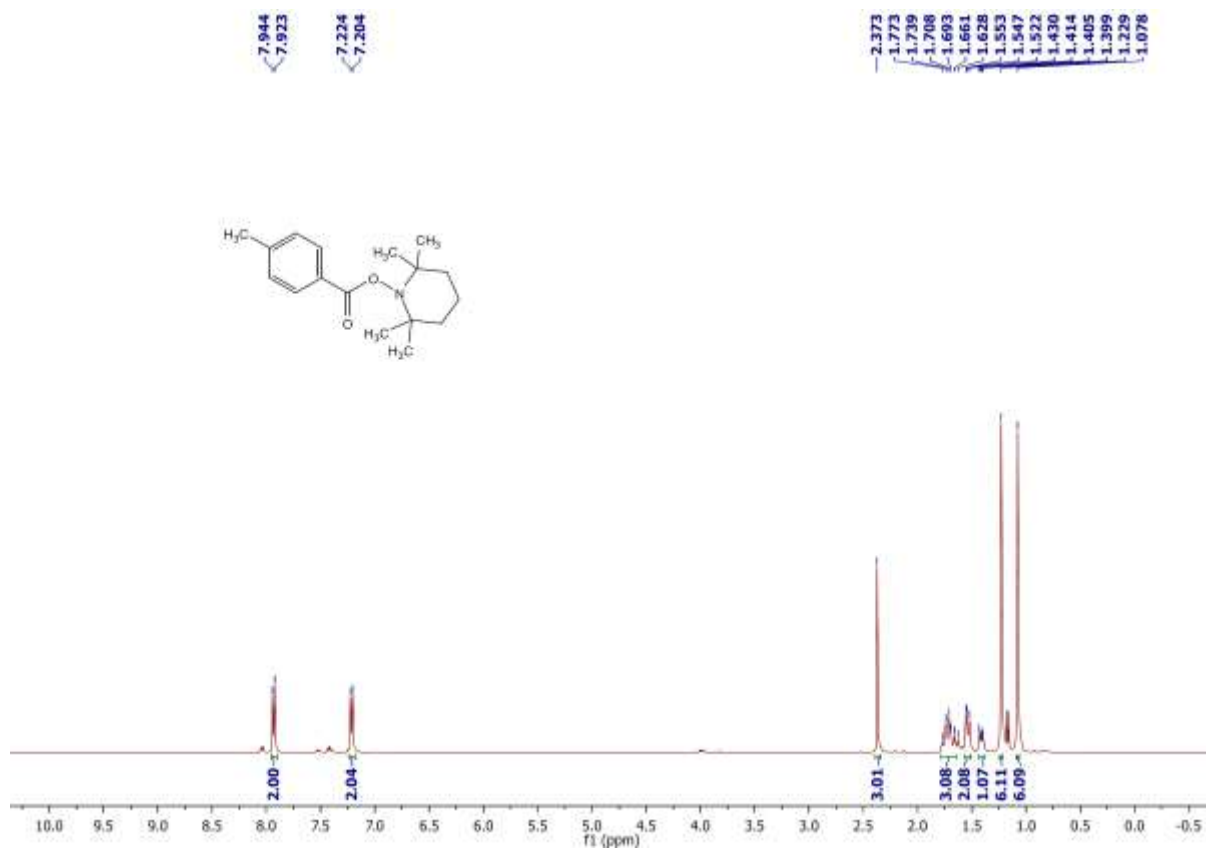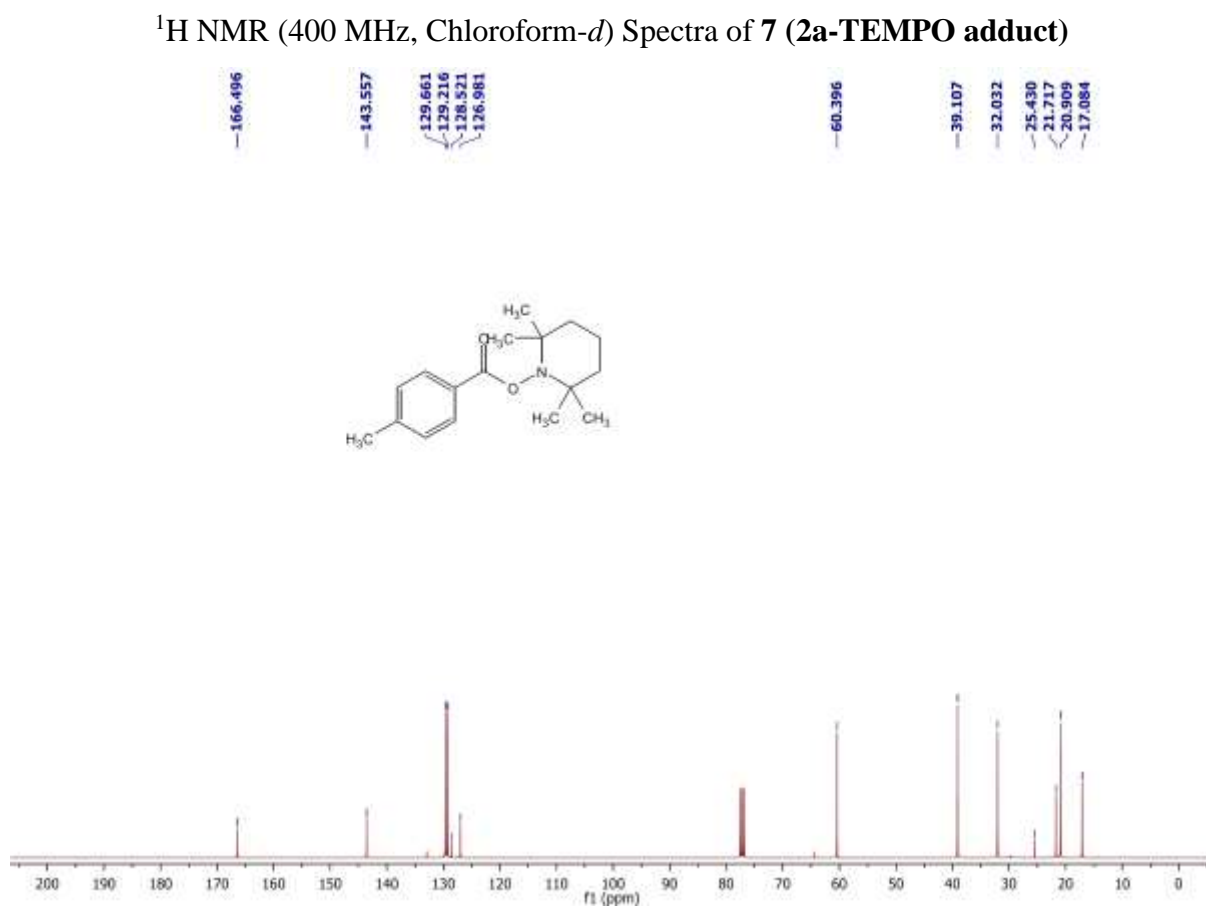

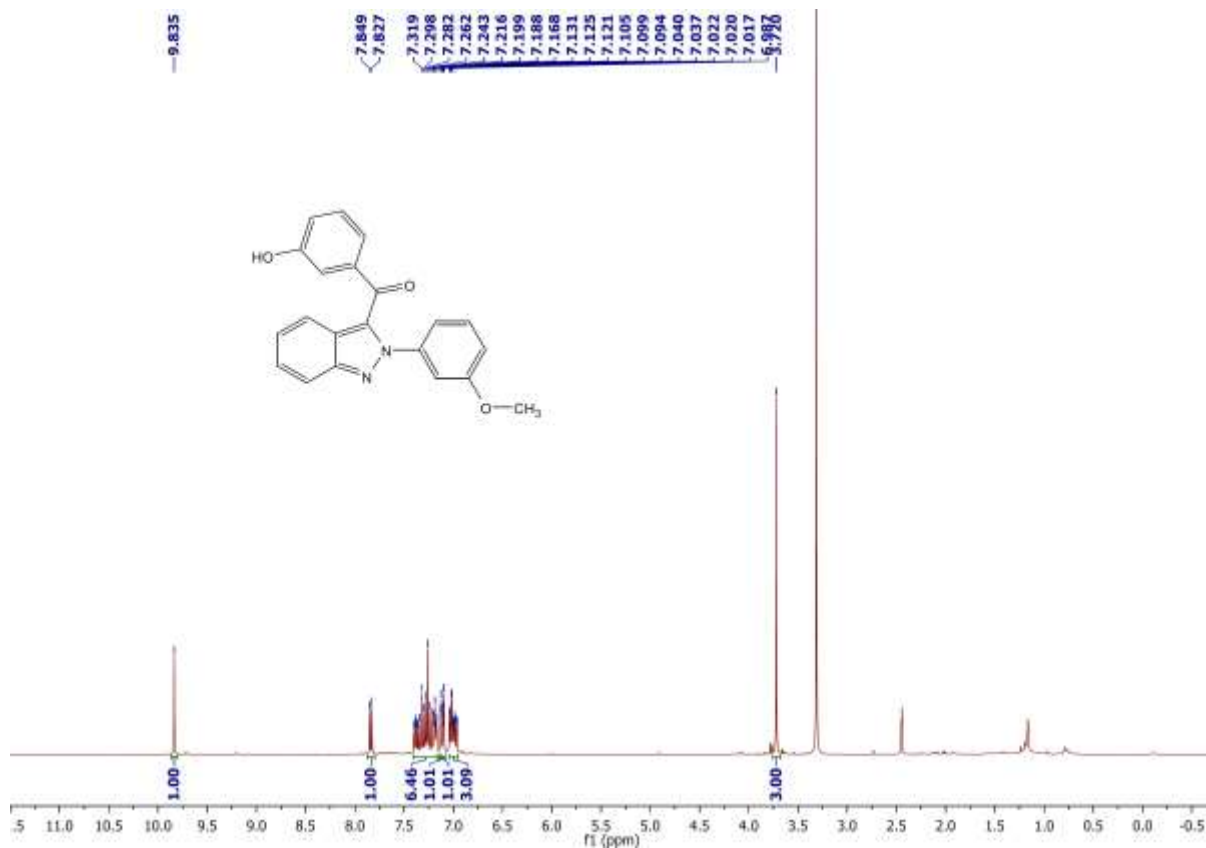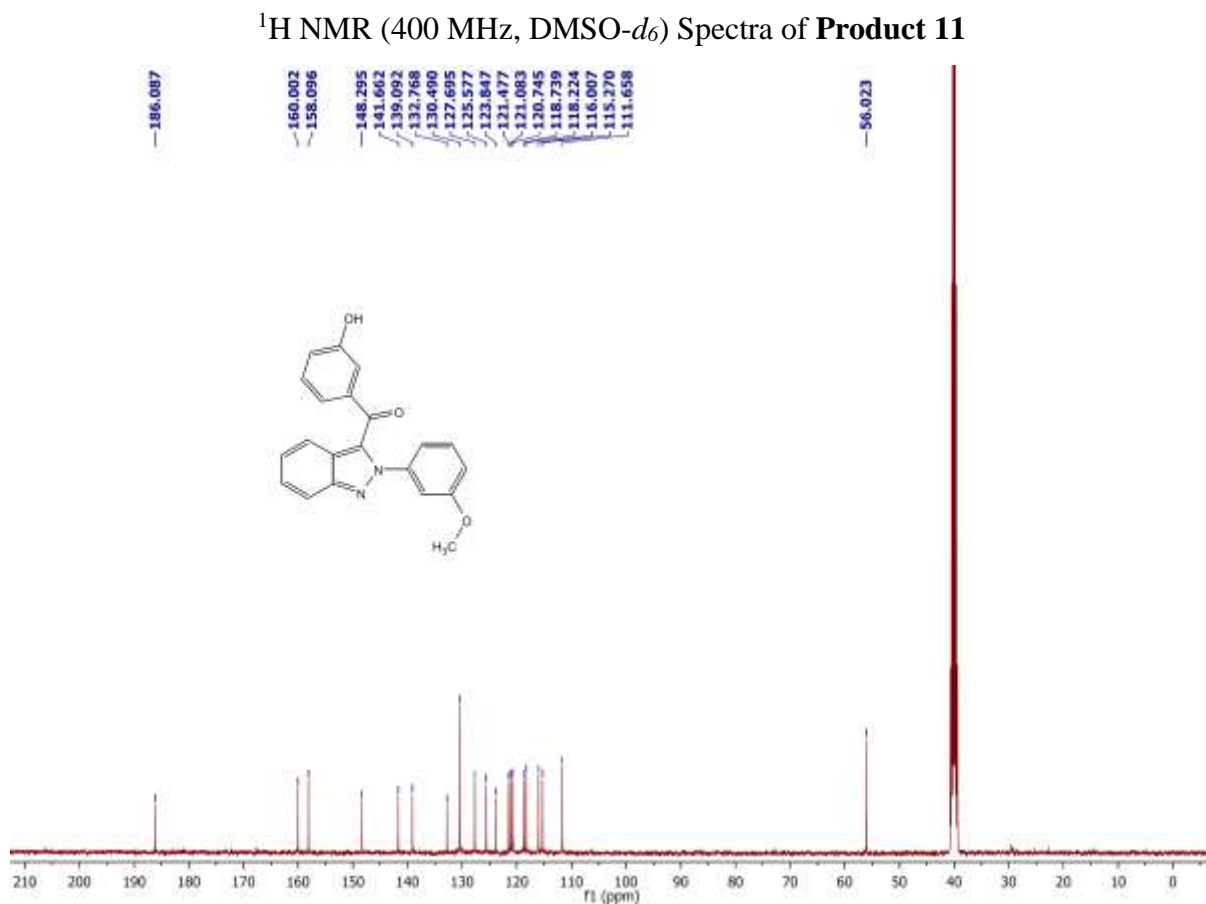



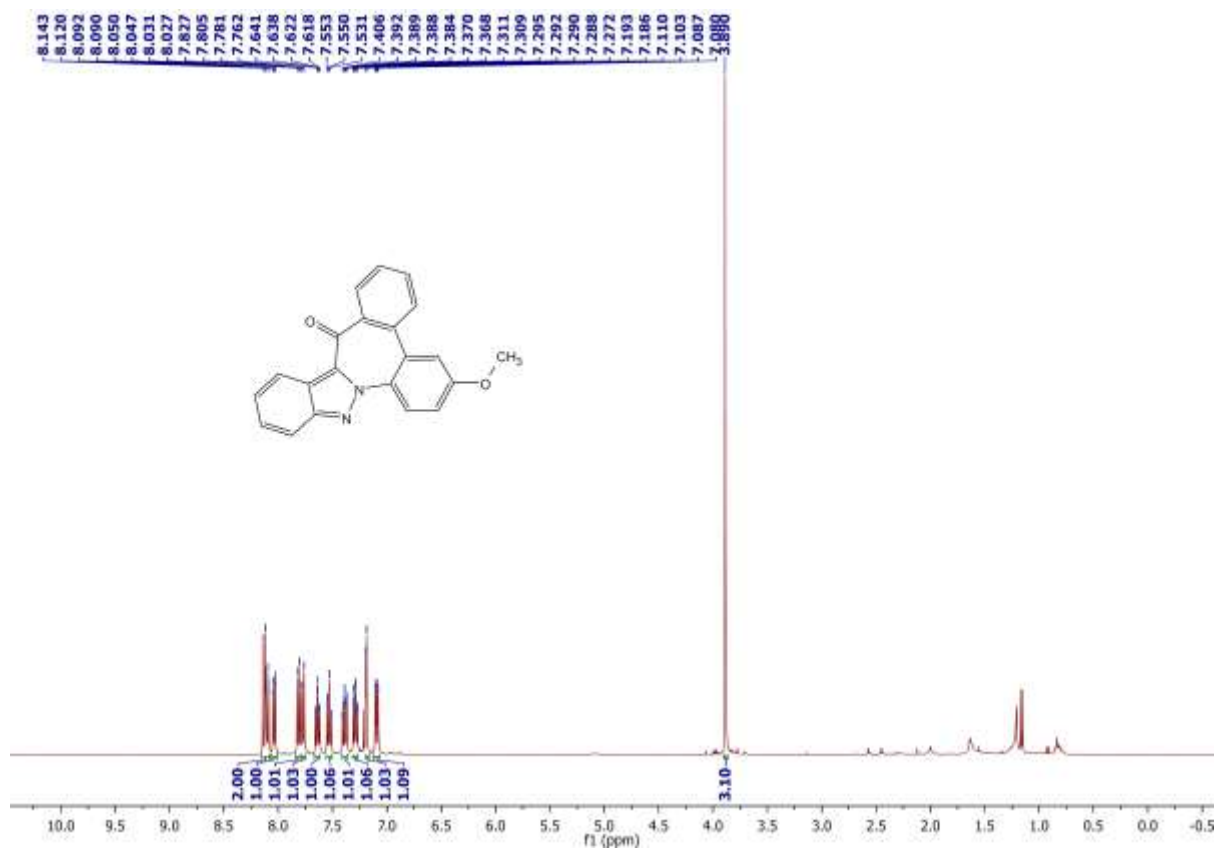

<sup>1</sup>H NMR (400 MHz, Chloroform-*d*) Spectra of **product 13**

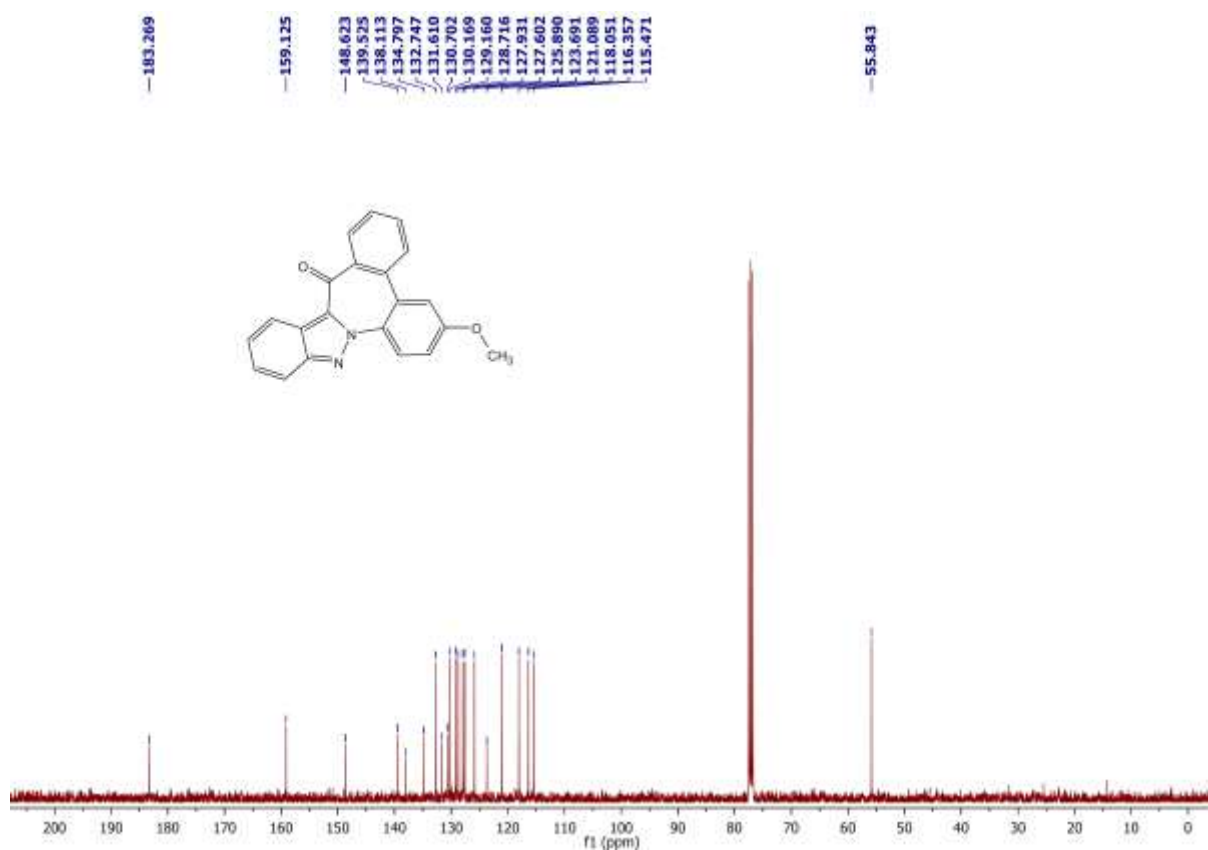

<sup>13</sup>C NMR (100 MHz, Chloroform-*d*) Spectra of **product 13**

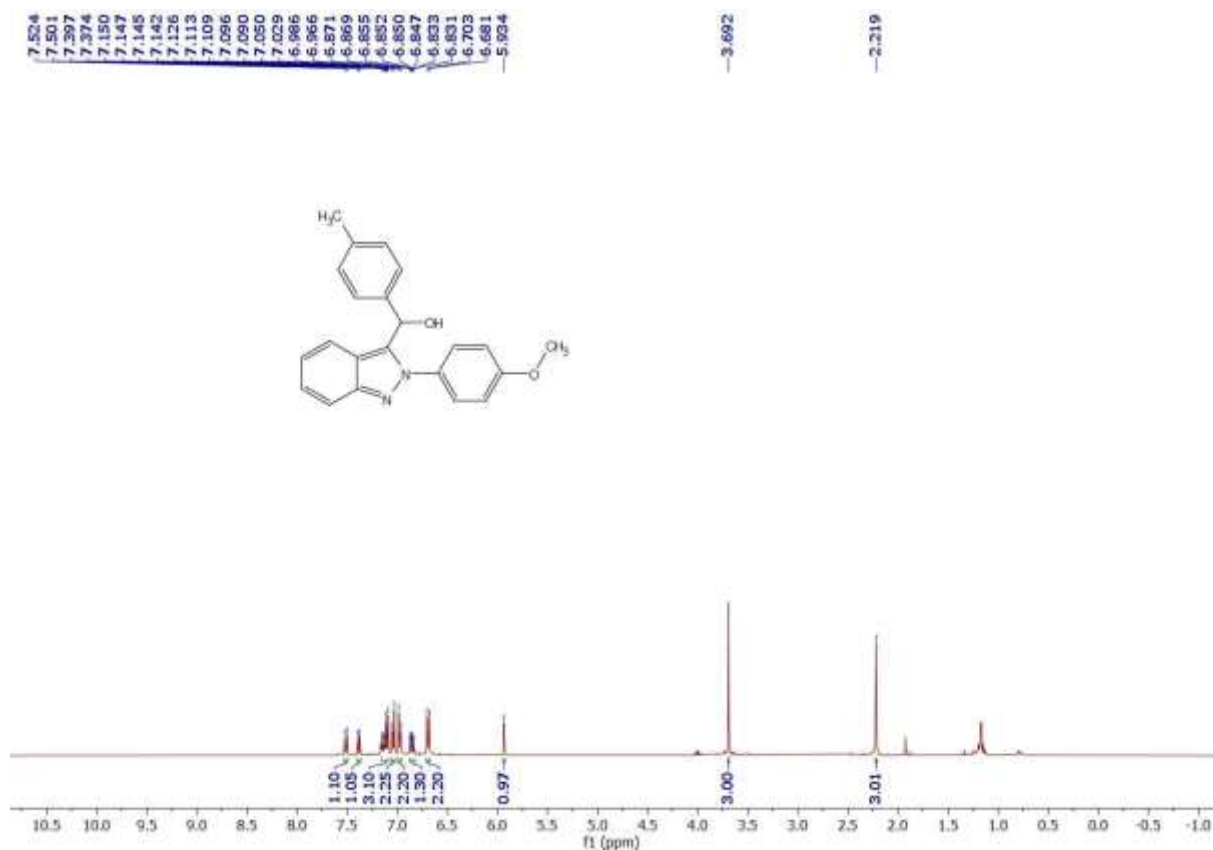

<sup>1</sup>H NMR (400 MHz, Chloroform-*d*) Spectra of **product 14**

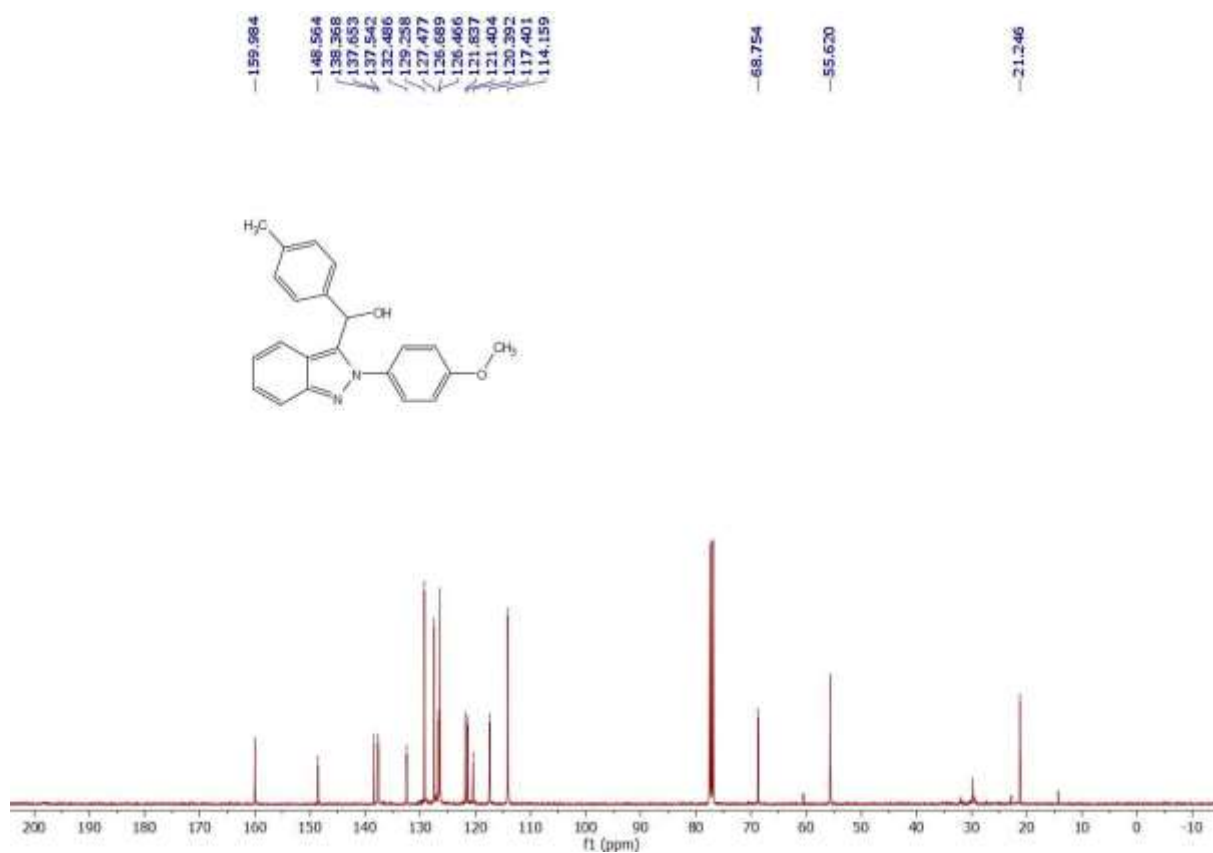

<sup>13</sup>C NMR (100 MHz, Chloroform-*d*) Spectra of **product 14**
